# Supplementary material for: Quantifying the role of modifiable risk factors in the differences in cardiovascular disease mortality rates between metropolitan and rural populations in Australia: a macrosimulation modelling study
Source: PubMed Central journal article supplement — BMJ Open. 2017 Nov 3;7(11):e018307. doi: 10.1136/bmjopen-2017-018307 (PMC5695309; doi:10.1136/bmjopen-2017-018307), 2017-11-03
Supplement: bmjopen-2017-018307.draft_revisions.pdf [file bmjopen-2017-018307.draft_revisions.pdf]

# BMJ Open

BMJ Open is committed to open peer review. As part of this commitment we make the peer review history of every article we publish publicly available.

When an article is published we post the peer reviewers' comments and the authors' responses online. We also post the versions of the paper that were used during peer review. These are the versions that the peer review comments apply to.

The versions of the paper that follow are the versions that were submitted during the peer review process. They are not the versions of record or the final published versions. They should not be cited or distributed as the published version of this manuscript.

BMJ Open is an open access journal and the full, final, typeset and author-corrected version of record of the manuscript is available on our site with no access controls, subscription charges or pay-per-view fees (<http://bmjopen.bmj.com>).

If you have any questions on BMJ Open's open peer review process please email [editorial.bmjopen@bmj.com](mailto:editorial.bmjopen@bmj.com)

# BMJ Open

**Quantifying the role of modifiable risk factors in the differences in cardiovascular disease mortality rates between metropolitan and rural populations in Australia: A macrosimulation modelling study.**

|                                 |                                                                                                                                                                                                                                                                                                           |
|---------------------------------|-----------------------------------------------------------------------------------------------------------------------------------------------------------------------------------------------------------------------------------------------------------------------------------------------------------|
| Journal:                        | <i>BMJ Open</i>                                                                                                                                                                                                                                                                                           |
| Manuscript ID                   | bmjopen-2017-018307                                                                                                                                                                                                                                                                                       |
| Article Type:                   | Research                                                                                                                                                                                                                                                                                                  |
| Date Submitted by the Author:   | 22-Jun-2017                                                                                                                                                                                                                                                                                               |
| Complete List of Authors:       | Alston, Laura; Deakin University, Waterfront Campus<br>Peterson, Karen; Deakin University - Geelong Waterfront Campus<br>Jacobs, Jane; Deakin University - Geelong Waterfront Campus<br>Allender, Steven; Deakin University, Faculty of Health<br>Nichols, Melanie; Deakin University, Faculty of Health; |
| <b>Primary Subject Heading</b>: | Public health                                                                                                                                                                                                                                                                                             |
| Secondary Subject Heading:      | Epidemiology                                                                                                                                                                                                                                                                                              |
| Keywords:                       | Coronary heart disease < CARDIOLOGY, NUTRITION & DIETETICS, PREVENTIVE MEDICINE, PUBLIC HEALTH                                                                                                                                                                                                            |
|                                 |                                                                                                                                                                                                                                                                                                           |

SCHOLARONE™  
Manuscripts

1  
2  
3 1 **TITLE:** Quantifying the role of modifiable risk factors in the differences in cardiovascular  
4 2 disease mortality rates between metropolitan and rural populations in Australia: A  
5 3 macrosimulation modelling study.

6  
7 4 **Authors:** Laura Alston<sup>a</sup>, Karen Louise Peterson<sup>a</sup>, Jane P Jacobs<sup>a</sup>, Steven Allender<sup>a</sup>, Melanie  
8 5 Nichols<sup>a</sup>.

9  
10 6 **Author affiliations:** <sup>a</sup>WHO Collaborating Centre for Obesity Prevention, Faculty of Health,  
11 7 Deakin University, Geelong, Australia.

12  
13 8 **Corresponding author:** Laura Alston. Address: WHO Collaborating Centre for Obesity  
14 9 Prevention, Faculty of Health, Deakin University, Locked Bag 20001, Geelong, VIC 3220  
15 10 Australia. Telephone: +61 3 5247 9426. Email: [laura.alston@deakin.edu.au](mailto:laura.alston@deakin.edu.au).

16  
17 11 **Previous presentations of this research:** none to declare.

18  
19 12 **Funding acknowledgments:** MN, KP, LA and JJ are supported by funding from the National  
20 13 Heart Foundation of Australia and Deakin University. SA is supported by funding from an  
21 14 Australian National Health and Medical Research Council/ National Heart Foundation of  
22 15 Australia Career Development Fellowship (APP1045836). He is also a researcher on the US  
23 16 National Institutes of Health grant titled, "Systems Science to Guide Whole-of- Community  
24 17 Childhood Obesity Interventions" (1R01HL115485-01A1) and within a NHMRC Centre for  
25 18 Research Excellence in Obesity Policy and Food Systems (APP1041020).

26  
27 19 **Keywords:** Rural, Risk factors, Cardiovascular disease, Ischaemic heart disease, Inequalities,  
28 20 Prevention

29  
30 21 **Word count (excluding references and abstract): 3,115 words**

31  
32 22

33  
34 23

1  
2  
3 24 **ABSTRACT**  
4

5 25 **Objectives:** Aims: (1) to quantify differences in modifiable risk factors between urban and rural  
6  
7  
8 26 populations, and (2) to determine the number of rural CVD and IHD deaths that could be averted or  
9  
10 27 delayed if risk factor levels in rural areas were equivalent to metropolitan areas.

11  
12  
13 28 **Setting:** National population estimates, risk factor prevalence, CVD and IHD deaths data were  
14  
15 29 analysed by rurality using the Preventable Risk Integrated Model (PRIME) macro-simulation chronic  
16  
17 30 disease risk model. Uncertainty analysis was conducted using a Monte Carlo simulation of 10,000  
18  
19 31 iterations to calculate 95% credible intervals (CI).

20  
21  
22 32 **Participants:** National datasets of males and females over the age of 18 years living in urban and  
23  
24 33 rural Australia.

25  
26  
27 34 **Results:** If people living in rural Australia had the same levels of risk factors as those in metropolitan  
28  
29 35 areas, approximately 1458 (95% credible interval (CI): 1088, 1803) deaths could be delayed from  
30  
31 36 cardiovascular disease (CVD) annually. Of these CVD deaths, 793 (95%CI: 506, 1065) would be from  
32  
33 37 IHD. The IHD mortality gap between metropolitan and rural populations would be reduced by 38.2%  
34  
35 38 (95%CI: 24.4%, 50.6%).

36  
37  
38 39 **Conclusions:** A significant portion of deaths from CVD and IHD could be averted with improvements  
39  
40 40 in risk factors; more than one third of the excess IHD deaths in rural Australia were attributed to  
41  
42 41 differences in risk factors. As much as two thirds of the increased IHD mortality rate in rural areas  
43  
44 42 could not be accounted for by modifiable risk factors, however, and this requires further  
45  
46 43 investigation.

47  
48  
49 44

50  
51  
52 45

53  
54  
55 46

47 **ARTICLE SUMMARY:**48 *Strengths:*

- 49 • This is the first study to attempt to quantify the role of modifiable factors in the increased  
50 burden of cardiovascular diseases in rural areas when compared to urban Australia.
- 51 • The PRIME model has been previously published and is internationally recognised.
- 52 • This study used three representative national datasets, including the Census, Australian  
53 Institute of Health and Welfare National Mortality Database and the Australian Health  
54 Survey, as inputs for the PRIME model.

55 *Limitations:*

- 56 • Data used in the model were self-reported, and could lead to underestimations of the level  
57 of behavioural risk factors and subsequently, mortality gap reductions, although it less likely  
58 that these biases would differentially affect rural vs metro populations.
- 59 • Very remote populations of Australia (0.9% of the total population) were excluded.

1  
2  
3 69 **INTRODUCTION**  
4  
5

6 70 Despite high quality, universal health care systems and standards in Australia, there are still  
7  
8 71 disparities in the burden of chronic disease experienced by people with lower socio-economic status,  
9  
10 72 Aboriginal and Torres Strait Islanders and rural residents(1). Australians living outside major cities  
11  
12 73 experience a substantially increased burden of cardiovascular diseases(2), which is consistent with  
13  
14 74 findings for rural populations in other developed countries such as the United States, Canada, and  
15  
16 75 the United Kingdom(3-5). Cardiovascular disease (CVD), in its most common form, Ischaemic heart  
17  
18 76 disease (IHD) is the leading cause of death in Australia(6), and individuals residing in a regional or  
19  
20 77 remote areas are estimated to be between 1.2 and 1.5 times more likely to die from IHD than those  
21  
22 78 residing in metropolitan areas(1).  
23  
24  
25  
26  
27

28  
29 80 The reasons for observed health inequalities between metropolitan and rural populations appear to  
30  
31 81 be multifactorial and highly complex(2, 7-9). It has been hypothesised that rural populations  
32  
33 82 experience greater CVD and IHD burden due to variation in access to health services, individual  
34  
35 83 socio-economic status, rates of modifiable risk factors, as well as reduced access to evidence-based  
36  
37 84 treatments in rural hospitals(7, 10-13). The National Rural Health Alliance (NRHA) of Australia states  
38  
39 85 that if rural Australians are to achieve the same health outcomes as their metropolitan counterparts  
40  
41 86 by the year 2020, it is not just access to health services that need to be improved(14), but that more  
42  
43 87 focus needs to be placed on improving the socio-economic determinants of health (such as lower  
44  
45 88 education, incomes, and employment) for rural communities, and reducing risk factors for chronic  
46  
47 89 diseases such as smoking and physical inactivity(14).  
48  
49  
50

51 90

52  
53  
54 91  
55  
56  
57  
58  
59  
60

1  
2  
3 92 Cardiovascular diseases, particularly IHD, are largely preventable (12), and the modifiable risk  
4  
5 93 factors are well known(13). Clinical risk factors such as high cholesterol, high blood pressure, and  
6  
7 94 obesity interact with behavioural factors such as poor diet, smoking, risky alcohol consumption, and  
8  
9 95 physical inactivity to increase the risk of IHD and CVD(13). Based on population health surveys, these  
10  
11 96 risk factors differ by rurality, with higher smoking rates, increased high risk alcohol consumption and  
12  
13 97 lower physical activity levels being reported by non-city dwelling Australians(2).  
14  
15  
16  
17  
18  
19

20 99 Currently, there is minimal evidence quantifying the extent to which modifiable risk factors  
21  
22 100 contribute to the increased burden of CVD and IHD in rural areas, and how much of this burden  
23  
24 101 could be reduced if behavioural risk factors were comparable among rural Australians as those  
25  
26 102 among their counterparts in cities. Increased knowledge of how differential risk factor rates  
27  
28 103 contribute to the increased rural CVD burden could support the identification of policy priorities and  
29  
30 104 prevention programs for rural areas, as previous public health prevention efforts have been shown  
31  
32 105 to be less effective for rural populations compared to those living in metropolitan areas(15).  
33  
34  
35  
36  
37

38 106

#### 38 107 **Aims:**

39  
40  
41 108 This study aimed to: (1) Quantify differences in prevalence of major CVD risk factors between rural  
42  
43 109 and metropolitan populations, and (2) Determine the number and proportion of rural deaths from  
44  
45 110 CVD, and specifically from IHD, that could be averted or delayed in rural areas if the levels of risk  
46  
47 111 factors were equivalent to those in metropolitan Australia.  
48  
49

50 112

#### 53 113 **METHODS**

##### 56 114 **The Preventable Risk Integrated Model (PRIME)**

1  
2  
3 115 This study used a macrosimulation model, the Preventable Risk Integrated Model (PRIME)(16), to  
4  
5 116 estimate age- and sex-specific changes in CVD and IHD mortality that would result from changes to  
6  
7 117 the population prevalence of risk factors in Australia. PRIME has been used in the UK, New Zealand  
8  
9 118 and Canada to model a range of risk factor scenarios(16-20). The model can be used to examine the  
10  
11 119 likely changes in mortality rates of many chronic diseases, including IHD, under different  
12  
13 120 counterfactual scenarios of population behavioural risk factors(16).

14  
15  
16 121 The PRIME model is built on a framework of linkage between, 1) modifiable behaviours; 2) clinical  
17  
18 122 risk factors; and 3) mortality outcomes. This framework is parameterised using the best available  
19  
20 123 evidence from meta-analyses of published studies, and is described in detail elsewhere(16). PRIME  
21  
22 124 requires data on prevalence of modifiable risk factors, mortality rates and population estimates by 5  
23  
24 125 year age groups and sex, for both baseline and counterfactual scenarios. For this study, PRIME was  
25  
26 126 used to estimate the number of CVD and IHD deaths that would be delayed or averted if those living  
27  
28 127 in rural Australia had the same modifiable risk factor levels as those living in major cities. The  
29  
30 128 baseline scenario used the current levels of modifiable risk factors in those living in rural areas, and  
31  
32 129 the counterfactual scenario involved applying the level of behavioural risk factors currently observed  
33  
34 130 among those living in metropolitan areas, to the rural population.

### 35 36 37 38 39 131 **Population data**

40  
41 132 Population size estimates by age, sex and rurality were derived from the most recent (2011)  
42  
43 133 Australian Census. The 'rural' population was defined as all residents not classified by the ABS as  
44  
45 134 living in major cities(21).

### 46 47 48 49 135 **Risk factor data**

50  
51 136 The risk factors included in the PRIME model were mean dietary intakes, alcohol consumption,  
52  
53 137 prevalence of smoking, and physical activity levels. Mean body mass index (BMI) scores, based on  
54  
55 138 measured height and weight data, from the rural population only, were also included in the baseline  
56  
57  
58  
59  
60



1  
2  
3 139 model. All risk factor estimates were obtained from the 2011-12 Australian Health Survey (AHS),  
4  
5 140 which surveyed people aged 2 years and over from all areas of Australia, excluding very remote  
6  
7 141 areas(22). Results were generated for 9973 individuals aged 15 years and over.  
8  
9  
10 142 Dietary intake data were collected using a 24-hour recall of all foods and fluids consumed in the day  
11  
12 143 prior to the interview. Participants provided 24-hour recall data on two separate occasions, at least 8  
13  
14 144 days apart. Implausible intakes were excluded if the day of intake data had an energy intake (EI) to  
15  
16 145 basal metabolic rate (BMR) ratio of less than 0.9, as per recommendation from the Australian  
17  
18 146 Bureau of Statistics(23). Mean daily dietary intakes were calculated for each participant for: energy  
19  
20 147 (kcal/day), fruit (g/day), vegetables (g/day), fibre (g/day), dietary cholesterol (mg/day), salt (g/day),  
21  
22 148 total fat (% EI), saturated fat (% EI), monounsaturated fat (% EI), and polyunsaturated fat (% EI). The  
23  
24 149 percentage of people who consumed less than one serve of fruit and less than one serve of  
25  
26 150 vegetables was also calculated as required by the model. Mean BMI for the rural population, by 5  
27  
28 151 year age group and sex, was required by the model, and the effect of obesity on mortality rates was  
29  
30 152 modelled using the differences in energy intake and physical activity levels between the two  
31  
32 153 populations. AHS participants were also asked to report if they were current smokers, ex-smokers,  
33  
34 154 or if they had never smoked, and the age- sex- and location-specific prevalence of each of these  
35  
36 155 categories were derived.  
37  
38  
39  
40  
41 156 The PRIME model requires the proportion of the population classified as 'sedentary', and physical  
42  
43 157 activity levels in the form of mean Metabolic Equivalent of Task (MET) hours per week, in the  
44  
45 158 remaining (active) population. The sedentary proportion of the population was calculated as the sum  
46  
47 159 of those classified as insufficiently active or sedentary by the ABS. Participants were classified as  
48  
49 160 insufficiently active or sedentary if they did not meet the physical activity recommendations of 150  
50  
51 161 minutes per week, over 5 separate sessions(24). Mean minutes of moderate and vigorous activity  
52  
53 162 over the last week as reported by AHS participants were used to calculate average daily minutes of  
54  
55  
56  
57  
58  
59  
60

1  
2  
3 163 activity. This duration was then multiplied by standard intensity factors (metabolic equivalents) to  
4  
5 164 convert the estimates to MET-hours of activity per week.  
6  
7

8 165 The model requires the percentage of non-drinkers within each population by age and sex, which  
9  
10 166 was calculated as those who reported either no alcohol consumption, or <1g per day, over the  
11  
12 167 surveyed period. Mean daily intake of pure alcohol in millilitres (mL), by age group and sex, was  
13  
14 168 calculated as the weighted daily mean (mL) within TableBuilder, then converted to grams of pure  
15  
16 169 alcohol.  
17  
18

### 19 170 **Mortality data**

20  
21  
22 171 Deaths due to CVD (ICD-10 code 100-199 ) and IHD (ICD-10 code 120-125) by state or territory and  
23  
24 172 remoteness area of usual residence, by sex and 5-year age group, among people aged 15 years and  
25  
26 173 over was provided by the Australian Institute of Health and Welfare (AIHW) for the year 2011 from  
27  
28 174 the AIHW National Mortality Database (unpublished).  
29  
30

### 31 175 **Mortality gap**

32  
33  
34 176 The mortality gap between rural and metropolitan areas was calculated by applying the  
35  
36 177 metropolitan death rate for those aged 15 years and over, to the rural population, to determine the  
37  
38 178 number of rural deaths that would be expected if cause-specific mortality rates were equal between  
39  
40 179 metropolitan and rural areas. This figure was subtracted from the actual number of deaths in rural  
41  
42 180 areas, to calculate the gap in mortality between the two populations.  
43  
44

### 45 181 **Uncertainty analysis**

46  
47  
48 182 Monte Carlo simulation of 10,000 iterations was used to generate 95% credible intervals for each of  
49  
50 183 the estimates of deaths delayed or averted under the counterfactual scenario.  
51  
52

## 53 184 **RESULTS**

### 54 55 56 185 **Differences in risk factors between rural and metropolitan areas** 57 58 59 60

1  
2  
3 186 There were a mixture of differences in dietary intake, between rural and metropolitan (Table 1), that  
4  
5 187 were statistically significant for many dietary components, although many were relatively small in  
6  
7 188 absolute magnitude. Some of the differences in intakes were favourable in rural areas, and others,  
8  
9 189 more favourable in metropolitan areas. Vegetable intakes were significantly higher for rural  
10  
11 190 populations ( $p < 0.001$ ), while intake of fruit was not significantly different between the two  
12  
13 191 populations.

14  
15  
16 192 Energy intakes and the percentage of energy from saturated fat were significantly higher among  
17  
18 193 rural populations ( $p < 0.05$ ). Rural females reported a significantly higher dietary cholesterol intake  
19  
20 194 ( $p < 0.05$ ) and lower percentage energy from polyunsaturated fat ( $p < 0.01$ ) than their metropolitan  
21  
22 195 counterparts. There were no other significant differences in intake across the other dietary  
23  
24 196 components analysed.

25  
26  
27  
28 197 Mean alcohol intake (g/day) in those who reported drinking alcohol was significantly higher in rural  
29  
30 198 areas for females ( $p < 0.05$ ), however there was no differences for males. There were no significant  
31  
32 199 differences in the proportion of low alcohol consumers between the two populations. There were  
33  
34 200 significantly more current smokers in rural areas compared to major cities (females 19.5% vs 14.0%;  
35  
36 201 males 24.2% vs 18.7%). The proportion of people who had never smoked was higher in metropolitan  
37  
38 202 areas.

39  
40  
41 203 Mean BMI for females was significantly higher ( $p < 0.001$ ) in rural areas compared to major cities  
42  
43 204 (females 26.8 vs 27.6 kg/m<sup>2</sup>; males 27.3 vs 27.8 kg/m<sup>2</sup>).

44  
45  
46 205 Fewer rural people were meeting recommendations for physical activity; 37.1% of males in rural  
47  
48 206 areas were meeting recommendations compared to 44.0% in major cities. This was also true for  
49  
50 207 females (36.5% in rural areas, 46.3% in cities). There were no significant differences between the  
51  
52 208 two populations in the mean MET hours per week of moderate-vigorous activity performed by the  
53  
54 209 active population.  
55  
56  
57  
58  
59  
60

Table 1: Differences in dietary intakes, rural compared with metropolitan areas, females and males 2011-12, with 95% Confidence Intervals (CI).

| Dietary component          | Females                                     |                                    |                 |                  | Males                      |                                    |                 |                  |
|----------------------------|---------------------------------------------|------------------------------------|-----------------|------------------|----------------------------|------------------------------------|-----------------|------------------|
|                            | Mean intake (95%Confidence interval): Rural | Mean intake (95% CI): Metropolitan | Mean difference | p-value (t-test) | Mean intake (95%CI): Rural | Mean intake (95% CI): Metropolitan | Mean difference | p-value (t-test) |
| <b>Fruit (g)</b>           | 257 (250, 264)                              | 264 (258, 269)                     | 7               | p= NS            | 222 (214, 231)             | 231 (225, 237)                     | 9               | p=NS             |
| <b>Serves*</b>             | 1.7 serves                                  | 1.9 serves                         |                 |                  | 1.5 serves                 | 1.5 serves                         |                 |                  |
| <b>Vegetables (g)</b>      | 201 (196, 205)                              | 184 (180, 187)                     | 17              | p<0.0001         | 180 (176, 186)             | 158 ( 155, 176)                    | 23              | p<0.0001         |
| <b>Serves*</b>             | 2.7 serves                                  | 2.45 serves*                       |                 |                  | 2.4 serves                 | 2.1 serves                         |                 |                  |
| <b>Energy intake (kJ)</b>  | 8496 (8372, 8620)                           | 8332 (8241, 8424)                  | 164             | P=0.03           | 10,987 (10,818, 11,157)    | 10,760 (10,634, 10,887)            | 227             | p=0.03           |
| <b>Fibre (g)</b>           | 23.10 (23, 24)                              | 23 (23, 24)                        | 0.4             | p=NS             | 27.0 (26.3, 27.7)          | 26.6 (26.1, 27.0)                  | 0.4             | p=NS             |
| <b>Sodium (mg)</b>         | 2339.25 (2282, 2396)                        | 2279 (2236, 2320)                  | 61              | p=NS             | 3046 (2969, 3121)          | 2973 (2914, 3032)                  | 72              | p=NS             |
| <b>Dietary cholesterol</b> | 299 (289, 309)                              | 284 (277, 292)                     | 15              | p=0.02           | 380 (366, 393)             | 375 (363, 385)                     | 5               | p=NS             |

|                                   |                   |                   |     |          |                   |                   |     |          |
|-----------------------------------|-------------------|-------------------|-----|----------|-------------------|-------------------|-----|----------|
| (mg)                              |                   |                   |     |          |                   |                   |     |          |
| % energy from fat                 | 32 (31.7, 32.5)   | 32 (31.5, 32)     | 0.3 | p=NS     | 31.5 (31, 32)     | 31 (30.5, 31.1)   | 0.7 | p=0.01   |
| % energy from saturated fat       | 13.1 (12.8, 13.3) | 12.4 (12.2, 12.5) | 0.7 | p<0.0001 | 12.9 (12.7, 13.2) | 12.1 (11.9, 12.3) | 0.8 | p<0.0001 |
| % energy from monounsaturated fat | 12 (11.8, 12.1)   | 12.1 (11.9, 12.3) | 0.1 | p=NS     | 12 (11.6, 12.0)   | 12 (11.8, 12.1)   | 0.1 | p=NS     |
| % energy from polyunsaturated fat | 4.8 (4.7, 4.9)    | 5 (5.0, 5.14)     | 0.2 | p=0.0016 | 4.6 (4.5, 4.7)    | 4.7 (4.6, 4.8)    | 0.8 | p=NS     |
| Alcohol intake (g)                | 21.6              | 17.5              | 4.1 | p=0.02   | 23.0              | 19.5              | 3.5 | p=NS     |
| % Current smokers                 | 17.4              | 12.5              | 4.9 | p=0.04   | 22.8              | 16                | 6.8 | p=0.002  |
| Physical activity (MET hours)     | 13.3              | 14.2              | 0.9 | p=NS     | 14.0              | 14.5              | 0.5 | p=NS     |

Notes: \*One serve of fruit is 150g, 1 serve of vegetables is 75g according to Australian dietary guidelines

## 1 Deaths from CVD and IHD averted or delayed by risk factor changes

2 In 2011, 13,600 people aged 15 years and over died from CVD outside of major cities. Of these  
3 deaths, 7560 of these deaths were caused by IHD.

4 In total, 1461 (1107, 1791) or 11% of all rural CVD deaths would be delayed or averted, if rural  
5 populations were to have the same levels of risk factors as their metropolitan counterparts (Table 2).

6 Of the deaths prevented from CVD, 793 (510, 1065) would be from IHD, slightly more of these  
7 among males (418) than females (374), a 10.5% reduction in rural IHD deaths. Premature IHD deaths  
8 (75 years and under), would account for 38.3% of the IHD deaths that would be delayed or averted,  
9 or 4% of all rural IHD deaths. Most of these premature deaths would be averted for males, 266 (232,  
10 301) compared to 37 (28, 46) in females.

11 *Table 2: Deaths averted or delayed from chronic diseases in rural Australia, under the*  
12 *counterfactual scenario, 95% Credible Intervals (CI), by sex.*

| Deaths               | Females (95% CI) | Males (95% CI) | Total (95% CI)    | % of total deaths from condition |
|----------------------|------------------|----------------|-------------------|----------------------------------|
| Overall CVD          | 828 (546, 1,092) | 629 (487, 768) | 1461 (1107, 1791) | 11%                              |
| CVD (Under 75 years) | 78 (66, 88)      | 343 (305, 380) | 420 (375,465)     | 3%                               |
| IHD                  | 375(147, 579)    | 418 (280, 549) | 793 (506, 1,065)  | 10.5%                            |
| IHD (Under 75 years) | 37 (29, 46)      | 267 (231, 301) | 304 (263, 345)    | 4%                               |

## 14 Deaths attributable to individual risk factors

15 Table 3 shows the number of deaths that would be delayed or averted under the counterfactual  
16 scenario for each individual risk factor for both CVD and IHD. Obesity and smoking, as individual risk  
17 factors, accounted for the largest numbers of CVD and IHD deaths that could be prevented in rural

18 areas, contributing 1,309 (1000, 1608), and 337 (290, 388) deaths delayed or averted respectively for  
 19 CVD, and 740 (95% CI: 504, 955) and 225 (95% CI: 192, 260) for IHD. The adjustment of fruit and  
 20 vegetable intakes showed that more people would die from CVD (-290 (-475, -103)) and IHD (-298  
 21 (95% CI: -486, -111)) if intakes in rural areas were adjusted to match those of metropolitan areas,  
 22 since in this case vegetable intakes would be worse under the counterfactual scenario. If the rural  
 23 diet as an individual risk factor were to be adjusted to the counterfactual scenario, an additional 190  
 24 (95% CI: 4, 380) IHD deaths would occur among rural Australians.

25 Table 3 shows the percentage of the mortality gap between major cities and rural areas that is  
 26 attributable to the risk factors modelled. There were 2075 excess IHD deaths in the rural population  
 27 in 2011. For the total rural population, risk factors accounted for 38.2% of the gap, leaving 61.8%  
 28 due to other, unmeasured factors. There were substantial differences by sex, with 28.1% of the gap  
 29 attributable to risk factor differences for males, compared to 66.7% for females.

30 *Table 3: Preventable deaths from CVD and IHD attributable to individual risk factors if rural*  
 31 *populations had the same risk factor levels as populations in major cities.*

| Risk factor          | Total CVD deaths averted/delayed under counterfactual scenario (95% CI) | Total IHD deaths averted/delayed under counterfactual scenario (95% CI) |
|----------------------|-------------------------------------------------------------------------|-------------------------------------------------------------------------|
| Overall diet         | -199 (-389, -10)                                                        | -190 (-380, -4)                                                         |
| Fruit and vegetables | -290 (-475, -103)                                                       | -298 (-486, -111)                                                       |
| Fibre                | -70 (-103, -39)                                                         | -47 (-75, -19)                                                          |
| Fats                 | 121 (98-145)                                                            | 133 (113-155)                                                           |
| Salt                 | 40 (17-62)                                                              | 19 (8-31)                                                               |
| Physical activity    | 84 (66-103)                                                             | 53 (38-69)                                                              |
| Smoking              | 337 (290-388)                                                           | 225 (192-260)                                                           |
| Alcohol              | -55 (-101, -18)                                                         | -28 (-52, -5)                                                           |

|                |                  |                |
|----------------|------------------|----------------|
| <b>Obesity</b> | 1309 (100, 1608) | 740 (50, -955) |
|----------------|------------------|----------------|

32 *Note: positive numbers represent deaths delayed or averted under the counterfactual scenario, negative numbers represent*  
 33 *an increase in deaths.*

34

## 35 **DISCUSSION**

36 This analysis showed that more than one third of the IHD mortality inequality between metro and  
 37 rural areas can be attributed to differences in modifiable risk factors, an important consideration for  
 38 health policy and intervention planning. Importantly, however, over 60% of the increased mortality  
 39 burden in rural areas was unexplained by risk factor differences.

40 The majority of modifiable risk factors were found to differ between rural and metropolitan areas,  
 41 with significantly higher BMI, energy intakes and proportion of energy intake from fats observed in  
 42 rural populations, along with higher levels of high risk alcohol consumption and sedentary  
 43 behaviour. Rural people did, however, report significantly higher vegetable intakes, which equated  
 44 to consumption of approximately 10% more vegetables than their metropolitan counterparts,  
 45 consistent with previous health survey data(2).

46 The origins of the differences in modifiable IHD risk factors between rural and metropolitan areas  
 47 (2), are likely to be complex, arising from the interaction of a range of factors at the individual and  
 48 community level, including socio-economic disadvantage, education levels, access to primary health  
 49 services and health literacy(28). Living outside of metropolitan areas has been associated with more  
 50 risk factors for chronic diseases in adults(25), with some evidence that geographic location should be  
 51 assessed as a social determinant of health, above and beyond socio-economic status and area level  
 52 disadvantage (26). There is evidence for this in that self-reported prevalence of IHD, diabetes and  
 53 cerebrovascular disease were found to be similar in rural and metropolitan areas, despite much  
 54 higher measured mortality rates from these diseases in rural areas, potentially revealing reduced  
 55 health awareness in rural populations (22). This may be an important contributor to differences in



1  
2  
3 56 outcomes for rural populations, as lower health literacy has been linked to poorer outcomes in  
4  
5 57 patients with heart disease(27).  
6  
7  
8 58 In terms of individual risk factors, differences in obesity and tobacco smoking appeared to have the  
9  
10 59 biggest impact on the increased burden of IHD in the rural population, when compared to  
11  
12 60 metropolitan areas. Obesity is a well-known risk factor for IHD(28), and has been consistently shown  
13  
14 61 to be higher in rural populations of Australia for the past few decades(29, 30). Differences in energy  
15  
16 62 intake and physical activity energy expenditure between rural and metropolitan populations led to  
17  
18 63 substantial reductions in obesity-mediated mortality in the counterfactual scenario. These  
19  
20 64 reductions explained the largest proportion of the mortality gap between the two populations of any  
21  
22 65 of the behaviours studied. Higher energy intakes in the rural sample, which increase the likelihood  
23  
24 66 of a higher BMI(31), could be reflective of the consumption of more low cost, energy dense foods  
25  
26 67 possibly in part, due to reduced access to healthier foods, which has been well documented in rural  
27  
28 68 and regional areas(32).  
29  
30  
31  
32 69 Tobacco smoking is recognised as the largest single preventable cause of mortality and morbidity in  
33  
34 70 Australia (33), and higher smoking rates in rural areas have been apparent since at least 1993(15,  
35  
36 71 25). Despite numerous public health initiatives and interventions over this period, the rural smoking  
37  
38 72 rate has remained comparatively high whilst the metropolitan rate has continued to decline(15, 33),  
39  
40 73 possibly indicating that such preventative efforts have not adequately reached rural Australians(15).  
41  
42  
43  
44 74 The results of this study suggest that substantial gains could be made in reducing the CVD mortality  
45  
46 75 gap between metropolitan and rural populations if modifiable risk behaviours could be improved in  
47  
48 76 rural areas. Improving risk factor profiles in rural populations to at least match that of their  
49  
50 77 metropolitan counterparts could be assumed to be a reasonable target, given that even  
51  
52 78 metropolitan risk factor levels are far from ideal(34, 35). Importantly, even if this scenario were to  
53  
54 79 be achieved, a significant proportion (almost two-thirds) of the excess deaths would remain, a  
55  
56  
57  
58  
59  
60

1  
2  
3 80 finding which should prompt major reflection on the role of disadvantage, health care provision and  
4  
5 81 other, less prominent risk factors in the perpetuation of rural health inequalities.  
6  
7  
8  
9

10  
11 82

12  
13  
14  
15  
16  
17  
18  
19  
20  
21  
22 83 **Strengths:**

23  
24 84 This study used three representative national datasets, including the Census, AIHW National  
25  
26 85 Mortality Database and the Australian Health Survey, as inputs for the PRIME model. The PRIME  
27  
28 86 model also has many strengths, including that it is able to model the effect of changes in multiple  
29  
30 87 risk factors simultaneously on mortality rates from different chronic diseases, by age and sex. The  
31  
32 88 model has been designed using the strongest available scientific evidence on the links between  
33  
34 89 chronic disease mortality and dietary intake, alcohol consumption, smoking, physical activity and  
35  
36 90 obesity levels(16).  
37  
38

39  
40  
41  
42  
43  
44  
45  
46  
47  
48  
49 91 **Limitations:**

50  
51 92 Data used in the model were self-reported, which carries multiple limitations, and could lead to  
52  
53 93 underestimations of the level of behavioural risk factors and subsequently, mortality gap reductions  
54  
55 94 (23), although it less likely that these biases would differentially affect rural vs metro populations.  
56  
57 95 Very remote areas of Australia were not sampled in AHS, therefore risk factor levels for these  
58  
59 96 populations were not included in the analysis(22). This may lead to an underestimation of the  
60  
61 97 prevalence of some risk factors, as residents of very remote areas are known to experience even  
62  
63 98 higher burden from IHD than the broader rural population(2), however they also represent a very  
64  
65 99 small percentage of the total Australian population (0.9%)(25). The uncertainty analysis conducted  
66  
67 100 on the number of deaths averted, only accounts for uncertainty within the model parameters, but  
68  
69 101 not the uncertainty of estimates from the Australian Health Survey.  
70

71  
72  
73  
74  
75  
76  
77  
78  
79  
80  
81  
82  
83  
84  
85  
86  
87  
88  
89  
90  
91  
92  
93  
94  
95  
96  
97  
98  
99  
100  
101  
102 **CONCLUSIONS**

1  
2  
3 103 There is potential for improvements in the level of cardiovascular disease burden observed in rural  
4  
5 104 Australians, if the prevalence of modifiable risk factors such as obesity and smoking were to be  
6  
7 105 reduced to match those of metropolitan areas. If such a scenario was to be achieved, 38% of the  
8  
9 106 mortality gap between rural and metropolitan areas could be reduced, however, investigations into  
10  
11 107 factors responsible for the remaining 62% of this inequality are needed in order to work towards  
12  
13 108 achieving health equality for rural populations.

#### 16 109 **Author Contributions**

17  
18 110 LA organised the collection and conversion of data, completed all data entry into the PRIME model,  
19  
20 111 analysis of the results, and writing of the manuscript. MN contributed to defining the original  
21  
22 112 research idea, data collection, use of the PRIME model and analysis. KP and JJ assisted with  
23  
24 113 conversion of the data to be compatible with the PRIME model. SA contributed to defining the  
25  
26 114 original research idea. All authors reviewed and contributed to the manuscript and all stages of  
27  
28 115 compilation.

30  
31  
32 116

#### 33 117 **Acknowledgements**

34  
35 118 Dr Peter Scarborough and team, who developed and provided the PRIME model used in this study.

36  
37 119

#### 38 120 **Conflict of Interest declaration**

39  
40 121 The authors declare there are no conflicts of interest

41  
42 122

#### 43 123 **Funding acknowledgments**

44  
45 124 MN, KP, LA and JJ are supported by funding from the National Heart Foundation of Australia and  
46  
47 125 Deakin University. SA is supported by funding from an Australian National Health and Medical  
48  
49 126 Research Council/ National Heart Foundation of Australia Career Development Fellowship  
50  
51 127 (APP1045836). He is also a researcher on the US National Institutes of Health grant titled, "Systems  
52  
53 128 Science to Guide Whole-of- Community Childhood Obesity Interventions" (1R01HL115485-01A1) and  
54  
55 129 within a NHMRC Centre for Research Excellence in Obesity Policy and Food Systems (APP1041020).

1  
2  
3 130  
4  
5 131  
6  
7 132  
8  
9 133  
10  
11  
12  
13  
14  
15  
16  
17  
18  
19  
20  
21  
22  
23  
24  
25  
26  
27  
28  
29  
30  
31  
32  
33  
34  
35  
36  
37  
38  
39  
40  
41  
42  
43  
44  
45  
46  
47  
48  
49  
50  
51  
52  
53  
54  
55  
56  
57  
58  
59  
60

For peer review only

## 134 REFERENCES:

- 135 1. Australian Institute of Health and Welfare. Mortality inequalities in Australia: bulletin 124.  
136 Canberra: AIHW; 2014.
- 137 2. Australian Bureau of Statistics. HEALTH OUTSIDE MAJOR CITIES Australia: ABS; 2011 [cited  
138 2015 10/06/2015]. Available from:  
139 <http://www.abs.gov.au/AUSSTATS/abs@.nsf/Lookup/4102.0Main+Features30Mar+2011>.
- 140 3. Levin KA, Leyland AH. Urban-rural inequalities in ischemic heart disease in Scotland, 1981-  
141 1999. *Am J Public Health*. 2006 Jan;96(1):145-51.
- 142 4. Kulshreshtha A, Goyal A, Dabhadkar K, Veledar E, Vaccarino V. Urban-rural differences in  
143 coronary heart disease mortality in the United States: 1999-2009. *Public Health Rep*. 2014 Jan-  
144 Feb;129(1):19-29.
- 145 5. Terashima M, Rainham DG, Levy AR. A small-area analysis of inequalities in chronic disease  
146 prevalence across urban and non-urban communities in the Province of Nova Scotia, Canada, 2007-  
147 2011. *BMJ open*. 2014;4(5)
- 148 6. ABS. 3303.0 - Causes of Death, Australia, 2013 Australia: ABS; 2015 [cited 2016 29/02/2016].  
149 Available from:  
150 [http://www.abs.gov.au/ausstats/abs@.nsf/Lookup/by%20Subject/3303.0~2013~Main%20Features~](http://www.abs.gov.au/ausstats/abs@.nsf/Lookup/by%20Subject/3303.0~2013~Main%20Features~Summary%20of%20findings~10000)  
151 [Summary%20of%20findings~10000](http://www.abs.gov.au/ausstats/abs@.nsf/Lookup/by%20Subject/3303.0~2013~Main%20Features~Summary%20of%20findings~10000).
- 152 7. Dinh Vu H, Heller RF, Lim LLY, D'Este C, O'Connell RL. Mortality after acute myocardial  
153 infarction is lower in metropolitan regions than in non-metropolitan regions. *Journal of*  
154 *Epidemiology and Community Health*. 2000;54(8):590-5.
- 155 8. Waters AM, Trinh L, Chau T, Bouchier M, Moon L. Latest statistics on cardiovascular disease  
156 in Australia. *Clinical and Experimental Pharmacology and Physiology*. 2013;40(6):347-56.
- 157 9. Sexton PT, Sexton TLH. Excess coronary mortality among Australian men and women living  
158 outside the capital city statistical divisions. *Medical Journal of Australia*. 2000;172(8):370-4.
- 159 10. Beard JR, Earnest A, Morgan G, Chan H, Summerhayes R, Dunn TM, et al. Socioeconomic  
160 disadvantage and acute coronary events: A spatiotemporal analysis. *Epidemiology*. 2008;19(3):485-  
161 92.
- 162 11. Dobson A, McLaughlin D, Vagenas D, Wong KY. Why are death rates higher in rural areas?  
163 Evidence from the Australian Longitudinal Study on Women's Health. *Australian And New Zealand*  
164 *Journal Of Public Health*. 2010;34(6):624-8.
- 165 12. Gausia K, Katzenellenbogen JM, Sanfilippo FM, Knuiman MW, Thompson PL, Hobbs MST, et  
166 al. Evidence-based prescribing of drugs for secondary prevention of acute coronary syndrome in  
167 Aboriginal and non- Aboriginal patients admitted to Western Australian hospitals. *Internal Medicine*  
168 *Journal*. 2014;44(4):353-61.
- 169 13. Jordan S, Wilson A, Dobson A. Management of heart conditions in older rural and urban  
170 Australian women. *Internal Medicine Journal*. 2011;41(10):722-9.
- 171 14. National Rural Health Alliance of Australia. The determinants of health in rural and remote  
172 Australia: fact sheet 28. Australian Capital Territory: National Rural Health Alliance; 2011.
- 173 15. National Rural Health Alliance of Australia. Smoking and rural health. Australian Capital  
174 Territory: National Rural Health Alliance; 2014.
- 175 16. Scarborough P, Harrington RA, Mizdrak A, Zhou LM, Doherty A. The Preventable Risk  
176 Integrated Model and Its Use to Estimate the Health Impact of Public Health Policy Scenarios.  
177 *Scientifica*. 2014.
- 178 17. Scarborough P, Morgan RD, Webster P, Rayner M. Differences in coronary heart disease,  
179 stroke and cancer mortality rates between England, Wales, Scotland and Northern Ireland: the role  
180 of diet and nutrition. *BMJ open*. 2011 Jan 1;1(1):e000263.
- 181 18. Scarborough P, Allender S, Clarke D, Wickramasinghe K, Rayner M. Modelling the health  
182 impact of environmentally sustainable dietary scenarios in the UK. *European journal of clinical*  
183 *nutrition*. 2012 Jun;66(6):710-5.

- 1  
2  
3 184 19. Nichols M, Scarborough P, Allender S, Rayner M. What is the optimal level of population  
4 185 alcohol consumption for chronic disease prevention in England? Modelling the impact of changes in  
5 186 average consumption levels. *BMJ open*. 2012;2(3).  
6 187 20. Belanger M, Poirier M, Jbilou J, Scarborough P. Modelling the impact of compliance with  
7 188 dietary recommendations on cancer and cardiovascular disease mortality in Canada. *Public health*.  
8 189 2014 Mar;128(3):222-30.  
9 190 21. Australian Bureau of Statistics. Australian Statistical Geography Standard Canberra,  
10 191 Australia: ABS; 2014 [cited 2016 04/07/2016]. Available from:  
11 192 <http://www.abs.gov.au/websitedbs/D3310114.nsf/home/Australian+Statistical+Geography+Standar>  
12 193 [d+\(ASGS\)](http://www.abs.gov.au/websitedbs/D3310114.nsf/home/Australian+Statistical+Geography+Standar).  
13 194 22. Australian Bureau of Statistics. 4363.0.55.001 - Australian Health Survey: Users' Guide, 2011-  
14 195 13: Sample design and selection Canberra: Australian Bureau of Statistics; 2015 [cited 2016  
15 196 20/06/2016]. Available from:  
16 197 <http://www.abs.gov.au/ausstats/abs@.nsf/Lookup/4363.0.55.001Chapter2102011-13>.  
17 198 23. Australian Bureau of Statistics. 4363.0.55.001 - Australian Health Survey: Users' Guide, 2011-  
18 199 13: UNDER-REPORTING IN NUTRITION SURVEYS Canberra: Australian Bureau of statistics; 2015 [cited  
19 200 2016 20/06/2016]. Available from:  
20 201 <http://www.abs.gov.au/ausstats/abs@.nsf/Lookup/4363.0.55.001Chapter651512011-13>.  
21 202 24. Australian Bureau of Statistics. 4363.0.55.001 - Australian Health Survey: Users' Guide, 2011-  
22 203 13 : Adult Physical Activity: Australian Bureau of Statistics 2015 [cited 2016 27/06/2016]. Available  
23 204 from:  
24 205 [http://www.abs.gov.au/ausstats/abs@.nsf/Lookup/59FF6FE5D62BABA1CA257BAC00225A07?opend](http://www.abs.gov.au/ausstats/abs@.nsf/Lookup/59FF6FE5D62BABA1CA257BAC00225A07?opendocument)  
25 206 [ocument](http://www.abs.gov.au/ausstats/abs@.nsf/Lookup/59FF6FE5D62BABA1CA257BAC00225A07?opendocument).  
26 207 25. 2014. Australian Institute of Health and Welfare. Australia's health 2014: Australia's health  
27 208 series no. 14. Cat. no. AUS 178: Health in regional and remote areas. . Canberra, Australia: AIHW;  
28 209 2014.  
29 210 26. Patterson KA, Cleland V, Venn A, Blizzard L, Gall S. A cross-sectional study of geographic  
30 211 differences in health risk factors among young Australian adults: the role of socioeconomic position.  
31 212 *BMC public health*. 2014;14:1278.  
32 213 27. Wu JR, Moser DK, DeWalt DA, Rayens MK, Dracup K. Health Literacy Mediates the  
33 214 Relationship Between Age and Health Outcomes in Patients With Heart Failure. *Circulation Heart*  
34 215 *failure*. 2016 Jan;9(1):e002250.  
35 216 28. World Heart Federation. World Heart Federation: 25 by 2025 Targets. Melbourne: World  
36 217 Heart Federation, 2014.  
37 218 29. National Rural Health Alliance of Australia. Obesity in rural Australia. Australian Capital  
38 219 Territory: National Rural Health Alliance; 2013.  
39 220 30. Australian Institute of Health and Welfare. Rural, regional and remote health: Indicators of  
40 221 health status and determinants of health. Canberra, Australia: Australian Institute of Health and  
41 222 Welfare; 2008.  
42 223 31. French SA, Story M, Jeffery RW. Environmental influences on eating and physical activity.  
43 224 *Annual review of public health*. 2001;22:309-35.  
44 225 32. Queensland health. 2014 Healthy food access basket survey, Queensland Queensland,  
45 226 Australia: Queensland Government; 2015 [cited 2016 22/06/2016]. Available from:  
46 227 <https://www.health.qld.gov.au/research-reports/reports/food/access/guidelines/default.asp>.  
47 228 33. Australian Institute of Health and Welfare. Australia's health 2014: Leading types of ill  
48 229 health: AIHW; 2014 [cited 2016 22/06/2016]. Available from: [http://www.aihw.gov.au/australias-](http://www.aihw.gov.au/australias-health/2014/ill-health/#t)  
49 230 [health/2014/ill-health/#t](http://www.aihw.gov.au/australias-health/2014/ill-health/#t).  
50 231 34. Ball K, Mishra GD, Thane CW, A H. How well do Australian women comply with dietary  
51 232 guidelines?. *Public Health Nutrition* 2004;4;7(3):443-52.  
52 233 35. Australian Bureau of Statistics. 4364.0.55.012 - Australian Health Survey: Consumption of  
53 234 Food Groups from the Australian Dietary Guidelines, 2011-12 Canberra,: Australian Bureau of

1  
2  
3  
4  
5  
6  
7  
8  
9  
10  
11  
12  
13  
14  
15  
16  
17  
18  
19  
20  
21  
22  
23  
24  
25  
26  
27  
28  
29  
30  
31  
32  
33  
34  
35  
36  
37  
38  
39  
40  
41  
42  
43  
44  
45  
46  
47  
48  
49  
50  
51  
52  
53  
54  
55  
56  
57  
58  
59  
60

235 Statistics 2016 [cited 2016 04/07/2016]. Available from:  
236 [http://www.abs.gov.au/websitedbs/D3310114.nsf/home/Australian+Statistical+Geography+Standar](http://www.abs.gov.au/websitedbs/D3310114.nsf/home/Australian+Statistical+Geography+Standard+(ASGS).)  
237 [d+\(ASGS\).](http://www.abs.gov.au/websitedbs/D3310114.nsf/home/Australian+Statistical+Geography+Standard+(ASGS).)

238  
239

For peer review only

Table 1: Differences in dietary intakes, rural compared with metropolitan areas, females and males 2011-12, with 95% Confidence Intervals (CI).

| Dietary component          | Females                                     |                                    |                 |                  | Males                      |                                    |                 |                  |
|----------------------------|---------------------------------------------|------------------------------------|-----------------|------------------|----------------------------|------------------------------------|-----------------|------------------|
|                            | Mean intake (95%Confidence interval): Rural | Mean intake (95% CI): Metropolitan | Mean difference | p-value (t-test) | Mean intake (95%CI): Rural | Mean intake (95% CI): Metropolitan | Mean difference | p-value (t-test) |
| <b>Fruit (g)</b>           | 257 (250, 264)                              | 264 (258, 269)                     | 7               | p= NS            | 222 (214, 231)             | 231 (225, 237)                     | 9               | p=NS             |
| <b>Serves*</b>             | 1.7 serves                                  | 1.9 serves                         |                 |                  | 1.5 serves                 | 1.5 serves                         |                 |                  |
| <b>Vegetables (g)</b>      | 201 (196, 205)                              | 184 (180, 187)                     | 17              | p<0.0001         | 180 (176, 186)             | 158 ( 155, 176)                    | 23              | p<0.0001         |
| <b>Serves*</b>             | 2.7 serves                                  | 2.45 serves*                       |                 |                  | 2.4 serves                 | 2.1 serves                         |                 |                  |
| <b>Energy intake (kJ)</b>  | 8496 (8372, 8620)                           | 8332 (8241, 8424)                  | 164             | P=0.03           | 10,987 (10,818, 11,157)    | 10,760 (10,634, 10,887)            | 227             | p=0.03           |
| <b>Fibre (g)</b>           | 23.10 (23, 24)                              | 23 (23, 24)                        | 0.4             | p=NS             | 27.0 (26.3, 27.7)          | 26.6 (26.1, 27.0)                  | 0.4             | p=NS             |
| <b>Sodium (mg)</b>         | 2339.25 (2282, 2396)                        | 2279 (2236, 2320)                  | 61              | p=NS             | 3046 (2969, 3121)          | 2973 (2914, 3032)                  | 72              | p=NS             |
| <b>Dietary cholesterol</b> | 299 (289, 309)                              | 284 (277, 292)                     | 15              | p=0.02           | 380 (366, 393)             | 375 (363, 385)                     | 5               | p=NS             |



1  
2  
3  
4  
5  
6  
7  
8  
9  
10  
11  
12  
13  
14  
15  
16  
17  
18  
19  
20  
21  
22  
23  
24  
25  
26  
27  
28  
29  
30  
31  
32  
33  
34  
35  
36  
37  
38  
39  
40  
41  
42  
43  
44  
45  
46  
47  
48  
49

|                                   |                   |                   |     |          |                   |                   |     |          |
|-----------------------------------|-------------------|-------------------|-----|----------|-------------------|-------------------|-----|----------|
| (mg)                              |                   |                   |     |          |                   |                   |     |          |
| % energy from fat                 | 32 (31.7, 32.5)   | 32 (31.5, 32)     | 0.3 | p=NS     | 31.5 (31, 32)     | 31 (30.5, 31.1)   | 0.7 | p=0.01   |
| % energy from saturated fat       | 13.1 (12.8, 13.3) | 12.4 (12.2, 12.5) | 0.7 | p<0.0001 | 12.9 (12.7, 13.2) | 12.1 (11.9, 12.3) | 0.8 | p<0.0001 |
| % energy from monounsaturated fat | 12 (11.8, 12.1)   | 12.1 (11.9, 12.3) | 0.1 | p=NS     | 12 (11.6, 12.0)   | 12 (11.8, 12.1)   | 0.1 | p=NS     |
| % energy from polyunsaturated fat | 4.8 (4.7, 4.9)    | 5 (5.0, 5.14)     | 0.2 | p=0.0016 | 4.6 (4.5, 4.7)    | 4.7 (4.6, 4.8)    | 0.8 | p=NS     |
| Alcohol intake (g)                | 21.6              | 17.5              | 4.1 | p=0.02   | 23.0              | 19.5              | 3.5 | p=NS     |
| % Current smokers                 | 17.4              | 12.5              | 4.9 | p=0.04   | 22.8              | 16                | 6.8 | p=0.002  |
| Physical activity (MET hours)     | 13.3              | 14.2              | 0.9 | p=NS     | 14.0              | 14.5              | 0.5 | p=NS     |

Notes: \*One serve of fruit is 150g, 1 serve of vegetables is 75g according to Australian dietary guidelines

1  
2  
3  
4  
5  
6  
7  
8  
9  
10  
11  
12  
13  
14  
15  
16  
17  
18  
19  
20  
21  
22  
23  
24  
25  
26  
27  
28  
29  
30  
31  
32  
33  
34  
35  
36  
37  
38  
39  
40  
41  
42  
43  
44  
45  
46  
47  
48  
49

For peer review only

Table 2: Deaths averted or delayed from chronic diseases in rural Australia, under the counterfactual scenario, 95% Credible Intervals (CI), by sex.

| Deaths                      | Females (95% CI) | Males (95% CI) | Total (95% CI)    | % of total deaths from condition |
|-----------------------------|------------------|----------------|-------------------|----------------------------------|
| <b>Overall CVD</b>          | 828 (546, 1,092) | 629 (487, 768) | 1461 (1107, 1791) | 11%                              |
| <b>CVD (Under 75 years)</b> | 78 (66, 88)      | 343 (305, 380) | 420 (375,465)     | 3%                               |
| <b>IHD</b>                  | 375(147, 579)    | 418 (280, 549) | 793 (506, 1,065)  | 10.5%                            |
| <b>IHD (Under 75 years)</b> | 37 (29, 46)      | 267 (231, 301) | 304 (263, 345)    | 4%                               |

Table 3: Preventable deaths from CVD and IHD attributable to individual risk factors if rural populations had the same risk factor levels as populations in major cities.

| Risk factor                 | Total CVD deaths averted/delayed under counterfactual scenario (95% CI) | Total IHD deaths averted/delayed under counterfactual scenario (95% CI) |
|-----------------------------|-------------------------------------------------------------------------|-------------------------------------------------------------------------|
| <b>Overall diet</b>         | -199 (-389, -10)                                                        | -190 (-380, -4)                                                         |
| <b>Fruit and vegetables</b> | -290 (-475, -103)                                                       | -298 (-486, -111)                                                       |
| <b>Fibre</b>                | -70 (-103, -39)                                                         | -47 (-75, -19)                                                          |
| <b>Fats</b>                 | 121 (98-145)                                                            | 133 (113-155)                                                           |
| <b>Salt</b>                 | 40 (17-62)                                                              | 19 (8-31)                                                               |
| <b>Physical activity</b>    | 84 (66-103)                                                             | 53 (38-69)                                                              |
| <b>Smoking</b>              | 337 (290-388)                                                           | 225 (192-260)                                                           |
| <b>Alcohol</b>              | -55 (-101, -18)                                                         | -28 (-52, -5)                                                           |
| <b>Obesity</b>              | 1309 (100, 1608)                                                        | 740 (50, -955)                                                          |

Note: positive numbers represent deaths delayed or averted under the counterfactual scenario, negative numbers represent an increase in deaths.

# BMJ Open

**Quantifying the role of modifiable risk factors in the differences in cardiovascular disease mortality rates between metropolitan and rural populations in Australia: A macrosimulation modelling study.**

|                                 |                                                                                                                                                                                                                                                                                                           |
|---------------------------------|-----------------------------------------------------------------------------------------------------------------------------------------------------------------------------------------------------------------------------------------------------------------------------------------------------------|
| Journal:                        | <i>BMJ Open</i>                                                                                                                                                                                                                                                                                           |
| Manuscript ID                   | bmjopen-2017-018307.R1                                                                                                                                                                                                                                                                                    |
| Article Type:                   | Research                                                                                                                                                                                                                                                                                                  |
| Date Submitted by the Author:   | 09-Aug-2017                                                                                                                                                                                                                                                                                               |
| Complete List of Authors:       | Alston, Laura; Deakin University, Waterfront Campus<br>Peterson, Karen; Deakin University - Geelong Waterfront Campus<br>Jacobs, Jane; Deakin University - Geelong Waterfront Campus<br>Allender, Steven; Deakin University, Faculty of Health<br>Nichols, Melanie; Deakin University, Faculty of Health; |
| <b>Primary Subject Heading</b>: | Public health                                                                                                                                                                                                                                                                                             |
| Secondary Subject Heading:      | Epidemiology                                                                                                                                                                                                                                                                                              |
| Keywords:                       | Coronary heart disease < CARDIOLOGY, NUTRITION & DIETETICS, PREVENTIVE MEDICINE, PUBLIC HEALTH                                                                                                                                                                                                            |
|                                 |                                                                                                                                                                                                                                                                                                           |

SCHOLARONE™  
Manuscripts

1  
2  
3  
4  
5  
6  
7  
8  
9  
10  
11  
12  
13  
14  
15  
16  
17  
18  
19  
20  
21  
22  
23  
24  
25  
26  
27  
28  
29  
30  
31  
32  
33  
34  
35  
36  
37  
38  
39  
40  
41  
42  
43  
44  
45  
46  
47  
48  
49  
50  
51  
52  
53  
54  
55  
56  
57  
58  
59  
60

1 **TITLE:** Quantifying the role of modifiable risk factors in the differences in cardiovascular  
2 disease mortality rates between metropolitan and rural populations in Australia: A  
3 macrosimulation modelling study.

4 **Authors:** Laura Alston<sup>a</sup>, Karen Louise Peterson<sup>a</sup>, Jane P Jacobs<sup>a</sup>, Steven Allender<sup>a</sup>, Melanie  
5 Nichols<sup>a</sup>.

6 **Author affiliations:** <sup>a</sup>Global Obesity Centre, Faculty of Health, Deakin University, Geelong,  
7 Australia.

8 **Corresponding author:** Laura Alston. Address: WHO Collaborating Centre for Obesity  
9 Prevention, Faculty of Health, Deakin University, Locked Bag 20001, Geelong, VIC 3220  
10 Australia. Telephone: +61 3 5247 9426. Email: [laura.alston@deakin.edu.au](mailto:laura.alston@deakin.edu.au).

11 **Previous presentations of this research:** none to declare.

12 **Funding acknowledgments:** MN, KP, LA and JJ are supported by funding from the National  
13 Heart Foundation of Australia and Deakin University. SA is supported by funding from an  
14 Australian National Health and Medical Research Council/ National Heart Foundation of  
15 Australia Career Development Fellowship (APP1045836). He is also a researcher on the US  
16 National Institutes of Health grant titled, "Systems Science to Guide Whole-of- Community  
17 Childhood Obesity Interventions" (1R01HL115485-01A1) and within a NHMRC Centre for  
18 Research Excellence in Obesity Policy and Food Systems (APP1041020).

19

20 **Keywords:** Rural, Risk factors, Cardiovascular disease, Ischaemic heart disease, Inequalities,  
21 Prevention

22 **Word count (excluding references and abstract): 3,115 words**

23

24

1  
2  
3 25 **ABSTRACT**  
4

5 26 **Objectives:** Aims: (1) to quantify differences in modifiable risk factors between urban and rural  
6  
7 27 populations, and (2) to determine the number of rural cardiovascular disease (CVD) and ischaemic  
8  
9 28 heart disease (IHD) deaths that could be averted or delayed if risk factor levels in rural areas were  
10  
11 29 equivalent to metropolitan areas.  
12

13  
14  
15 30 **Setting:** National population estimates, risk factor prevalence, CVD and IHD deaths data were  
16  
17 31 analysed by rurality using the Preventable Risk Integrated Model (PRIME) macro-simulation chronic  
18  
19 32 disease risk model. Uncertainty analysis was conducted using a Monte Carlo simulation of 10,000  
20  
21 33 iterations to calculate 95% credible intervals (CI).  
22

23  
24 34 **Participants:** National datasets of males and females over the age of 18 years living in urban and  
25  
26 35 rural Australia.  
27

28  
29 36 **Results:** If people living in rural Australia had the same levels of risk factors as those in metropolitan  
30  
31 37 areas, approximately 1461 (95% credible interval (CI): 1107, 1791) deaths could be delayed from  
32  
33 38 cardiovascular disease (CVD) annually. Of these CVD deaths, 793 (95%CI: 506, 1065) would be from  
34  
35 39 IHD. The IHD mortality gap between metropolitan and rural populations would be reduced by 38.2%  
36  
37 40 (95%CI: 24.4%, 50.6%).  
38

39  
40 41 **Conclusions:** A significant portion of deaths from CVD and IHD could be averted with improvements  
41  
42 42 in risk factors; more than one third of the excess IHD deaths in rural Australia were attributed to  
43  
44 43 differences in risk factors. As much as two thirds of the increased IHD mortality rate in rural areas  
45  
46 44 could not be accounted for by modifiable risk factors, however, and this requires further  
47  
48 45 investigation.  
49

50  
51 46  
52

53  
54  
55 47  
56

57  
58 48  
59  
60

49 **ARTICLE SUMMARY:**50 *Strengths:*

- 51 • This is the first study to attempt to quantify the role of modifiable factors in the increased  
52 burden of cardiovascular diseases in rural areas when compared to urban Australia.
- 53 • The PRIME model has been previously published and is internationally recognised.
- 54 • This study used three representative national datasets, including the Census, Australian  
55 Institute of Health and Welfare National Mortality Database and the Australian Health  
56 Survey, as inputs for the PRIME model.

57 *Limitations:*

- 58 • Data used in the model were self-reported, and could lead to underestimations of the level  
59 of behavioural risk factors and subsequently, mortality gap reductions, although it is unlikely  
60 that these biases would differentially affect rural vs metro populations.
- 61 • Very remote populations of Australia (0.9% of the total population) were excluded.



1  
2  
3 71 **INTRODUCTION**  
4  
5

6 72 Despite high quality, universal health care systems and standards in Australia, there are still  
7  
8 73 disparities in the burden of chronic disease experienced by people with lower socio-economic status,  
9  
10 74 Aboriginal and Torres Strait Islanders and rural residents(1). Australians living outside major cities  
11  
12 75 experience a substantially increased burden of cardiovascular diseases(2), which is consistent with  
13  
14 76 findings for rural populations in other developed countries such as the United States, Canada, and  
15  
16 77 the United Kingdom(3-5). Cardiovascular disease (CVD), in its most common form, Ischaemic heart  
17  
18 78 disease (IHD) is the leading cause of death in Australia(6), and individuals residing in a regional or  
19  
20 79 remote areas are estimated to be between 1.2 and 1.5 times more likely to die from IHD than those  
21  
22 80 residing in metropolitan areas(1).  
23  
24  
25

26 81

27  
28 82 The reasons for observed health inequalities between metropolitan and rural populations appear to  
29  
30 83 be multifactorial and highly complex(2, 7-9). It has been hypothesised that rural populations  
31  
32 84 experience greater CVD and IHD burden due to variation in access to health services, individual  
33  
34 85 socio-economic status, rates of modifiable risk factors, as well as potentially reduced access to  
35  
36 86 specialised evidence-based treatments, such as prompt surgical intervention in rural hospitals(7, 10-  
37  
38 87 13). The National Rural Health Alliance (NRHA) of Australia states that if rural Australians are to  
39  
40 88 achieve the same health outcomes as their metropolitan counterparts by the year 2020, it is not just  
41  
42 89 access to health services that need to be improved(14), but that more focus needs to be placed on  
43  
44 90 improving the socio-economic determinants of health (such as lower education, incomes, and  
45  
46 91 employment) for rural communities, and reducing risk factors for chronic diseases such as smoking  
47  
48 92 and physical inactivity(14).  
49  
50  
51

52 93

53  
54  
55  
56 94  
57  
58  
59  
60

1  
2  
3 95 Cardiovascular diseases, particularly IHD, are largely preventable, and the modifiable, behavioural  
4  
5 96 risk factors are well known(15). Clinical risk factors such as high cholesterol, high blood pressure, and  
6  
7 97 obesity interact with behavioural factors such as poor diet, smoking, risky alcohol consumption, and  
8  
9 98 physical inactivity to increase the risk of IHD and CVD(13). Based on population health surveys, these  
10  
11 99 risk factors differ by rurality, with higher smoking rates, increased high risk alcohol consumption and  
12  
13  
14 100 lower physical activity levels being reported by non-city dwelling Australians(2).  
15  
16  
17 101  
18  
19  
20 102 Currently, there is minimal evidence quantifying the extent to which modifiable individual risk  
21  
22 103 factors contribute to the increased burden of CVD and IHD in rural areas, and how much of this  
23  
24 104 burden could be reduced if behavioural risk factors were comparable among rural Australians as  
25  
26 105 those among their counterparts in cities. Increased knowledge of how differential risk factor rates  
27  
28 106 contribute to the increased rural CVD burden could support the identification of policy priorities and  
29  
30 107 prevention programs for rural areas, as previous public health prevention efforts have been shown  
31  
32 108 to be less effective for rural populations compared to those living in metropolitan areas(16).  
33  
34  
35 109  
36  
37

#### 38 110 **Aims:**

39  
40  
41 111 This study aimed to: (1) Quantify differences in prevalence of major CVD risk factors between rural  
42  
43 112 and metropolitan populations, and (2) Determine the number and proportion of rural deaths from  
44  
45 113 CVD, and specifically from IHD, that could be averted or delayed in rural areas if the levels of risk  
46  
47 114 factors were equivalent to those in metropolitan Australia.  
48  
49  
50 115

#### 51 52 53 116 **METHODS**

##### 54 55 56 117 **The Preventable Risk Integrated Model (PRIME)** 57 58 59 60

1  
2  
3 118 This study used a macrosimulation model, the Preventable Risk Integrated Model (PRIME)(17), to  
4  
5 119 estimate age- and sex-specific changes in CVD and IHD mortality that would result from changes to  
6  
7 120 the population prevalence of risk factors in Australia. An exemption from ethics review was obtained  
8  
9 121 from Deakin University's Human Research Ethics Unit. PRIME has been used in the UK, New Zealand  
10  
11 122 and Canada to model a range of risk factor scenarios(17-20). The model can be used to examine the  
12  
13 123 likely changes in mortality rates of many chronic diseases, including IHD, under different  
14  
15 124 counterfactual scenarios of population behavioural risk factors(17).

16  
17  
18  
19 125 The PRIME model is built on a framework of linkage between, 1) modifiable behaviours; 2) clinical  
20  
21 126 risk factors; and 3) mortality outcomes. This framework is parameterised using the best available  
22  
23 127 evidence from meta-analyses of published studies, and is described in detail elsewhere(17). PRIME  
24  
25 128 requires data on prevalence of modifiable risk factors, mortality rates and population estimates by 5  
26  
27 129 year age groups and sex, for both baseline and counterfactual scenarios. For this study, PRIME was  
28  
29 130 used to estimate the number of CVD and IHD deaths that would be delayed or averted if those living  
30  
31 131 in rural Australia had the same modifiable risk factor levels as those living in major cities. The  
32  
33 132 baseline scenario used the current levels of modifiable risk factors in those living in rural areas, and  
34  
35 133 the counterfactual scenario involved applying the level of risk factors currently observed in the  
36  
37 134 metropolitan population. An additional 'best case' scenario was also modelled, by only changing risk  
38  
39 135 factor levels that were more favourable among those living in metropolitan areas, when compared  
40  
41 136 to the rural population.

#### 42 43 44 45 137 **Population data**

46  
47  
48 138 Population size estimates by age, sex and rurality were derived from the 2011 Australian Census.  
49  
50 139 The 'rural' population was defined as all residents not classified by the ABS as living in major  
51  
52 140 cities(21). These data were accessed through subscription to the online ABS data program  
53  
54 141 TableBuilder(22).

#### 55 56 57 142 **Risk factor data**

1  
2  
3 143 The individual modifiable risk factors included in the PRIME model (table 1) were; mean dietary  
4  
5 144 intakes, alcohol consumption, prevalence of smoking, physical activity levels and mean body mass  
6  
7 145 index (BMI) scores. All risk factor estimates were obtained from 9973 individuals aged 15 years and  
8  
9  
10 146 over surveyed for the 2011-12 Australian Health Survey (AHS), which surveyed people from all areas  
11  
12 147 of Australia, excluding very remote areas(23). Mean values were calculated by age, sex and  
13  
14 148 remoteness for each risk factor parameter, through the ABS program TableBuilder(22).

15  
16  
17 149 *Table 1: Summary of risk factor data entered into the PRIME model.*

| Risk factor       | Parameter                                                       | Unit                     |
|-------------------|-----------------------------------------------------------------|--------------------------|
| Diet              | Total energy intake                                             | Kcal/day                 |
|                   | Proportion of low/non-consumers of fruit (<1 serve/day)         | % of population          |
|                   | Proportion of low/non-consumers of vegetables (<1 serve/day)    | % of population          |
|                   | Mean vegetable consumption remaining population                 | g/day                    |
|                   | Mean fruit consumption remaining population                     | g/day                    |
|                   | Fibre consumption                                               | g/day                    |
|                   | Dietary cholesterol consumption                                 | mg/day                   |
|                   | Salt consumption                                                | g/day                    |
|                   | Total fat intake                                                | % of total energy intake |
|                   | Saturated fat intake                                            | % of total energy intake |
|                   | Mono-unsaturated fat intake                                     | % of total energy intake |
|                   | Poly-unsaturated fat intake                                     | % of total energy intake |
| Alcohol           | Proportion of low consumers (<1g/day)                           | % of population          |
|                   | Mean consumption among remaining population                     | g/day of pure alcohol    |
| Smoking           | Current smokers                                                 | % of population          |
|                   | Ex-smokers                                                      | % of population          |
|                   | Never smokers                                                   | % of population          |
| Physical activity | Proportion of population who are sedentary                      | % of population          |
|                   | Amount of moderate-vigorous activity among remaining population | MET-hours per week       |
| Anthropometry     | BMI                                                             | kg/m <sup>2</sup>        |
|                   | Height                                                          | metres                   |

150 *Abbreviations: BMI= Body Mass Index, g=grams, MET= metabolic equivalent task.*

151

152 Dietary intake data were collected using a 24-hour recall of all foods and fluids consumed in the day  
153 prior to the interview. Participants provided 24-hour recall data on two separate occasions, at least 8  
154 days apart. Implausible intakes were excluded if the day of intake data had an energy intake (EI) to

1  
2  
3 155 basal metabolic rate (BMR) ratio of less than 0.9, as per recommendation from the Australian  
4  
5 156 Bureau of Statistics(23). Mean daily dietary intakes from the two days of data collection were  
6  
7 157 calculated for each participant for: energy (kcal/day), fruit (g/day), vegetables (g/day), fibre (g/day),  
8  
9 158 dietary cholesterol (mg/day), salt (g/day), total fat (% EI), saturated fat (% EI), monounsaturated fat  
10  
11 159 (% EI), and polyunsaturated fat (% EI). The percentage of people who consumed less than one serve  
12  
13  
14 160 of fruit and less than one serve of vegetables was also calculated as required by the model. Mean  
15  
16 161 BMI for the rural population, by 5 year age group and sex, was required by the model, and the effect  
17  
18 162 of obesity on mortality rates was modelled using the differences in energy intake and physical  
19  
20 163 activity levels between the two populations. Participants reported if they were current smokers, ex-  
21  
22 164 smokers, or if they had never smoked, and the age- sex- and location-specific prevalence of each of  
23  
24 165 these categories were derived.

26  
27 166 The PRIME model requires the proportion of the population classified as 'sedentary', and physical  
28  
29 167 activity levels in the form of mean Metabolic Equivalent of Task (MET) hours per week, in the  
30  
31 168 remaining (active) population. The sedentary proportion of the population was calculated as the sum  
32  
33 169 of those classified as insufficiently active or sedentary by the ABS. Participants were classified as  
34  
35 170 insufficiently active or sedentary if they did not meet the physical activity recommendations of 150  
36  
37 171 minutes per week, over 5 separate sessions(24). Mean minutes of moderate and vigorous activity  
38  
39 172 over the last week were used to calculate average daily minutes of activity. This duration was then  
40  
41 173 multiplied by metabolic equivalents as provided by the ABS, to convert the estimates to MET-hours  
42  
43 174 of activity per week.

46  
47 175 The model requires the percentage of non-drinkers within each population by age and sex, which  
48  
49 176 was calculated as those who reported either no alcohol consumption, or <1g per day on average,  
50  
51 177 over the surveyed period. Mean daily intake of pure alcohol in millilitres (mL), by age group and sex,  
52  
53 178 was calculated as the weighted daily mean (mL) within TableBuilder, then converted to grams of  
54  
55 179 pure alcohol.  
56  
57  
58  
59  
60

**180 Mortality data**

181 Deaths due to CVD (ICD-10 codes I00-I99 ) and IHD (ICD-10 code I20-I25) by state or territory and  
182 remoteness area of usual residence, by sex and 5-year age group, among people aged 15 years and  
183 over was provided by the Australian Institute of Health and Welfare (AIHW) for the year 2011 from  
184 the AIHW National Mortality Database (unpublished). These data were provided after an application  
185 for a specific request to the AIHW, and are not publicly available.

**186 Mortality gap**

187 The mortality gap between rural and metropolitan areas was calculated by applying the  
188 metropolitan death rate for those aged 15 years and over, to the rural population, to determine the  
189 number of rural deaths that would be expected if cause-specific mortality rates were equal between  
190 metropolitan and rural areas. This figure was subtracted from the actual number of deaths in rural  
191 areas, to calculate the gap in mortality between the two populations.

**192 Uncertainty analysis**

193 The PRIME model has a built in Monte Carlo analysis function to generate 95% credible intervals  
194 around the outputs, which allows for the different distribution of epidemiological parameters (for  
195 example the level of relative risk for a disease outcome for a particular risk factor level) within the  
196 model that have been derived from the literature(17).The intervals produced are based only on the  
197 uncertainty in the model parameters, and not on the variability of the original data used in the  
198 baseline and counterfactual scenarios. Monte Carlo simulation of 10,000 iterations was used to  
199 generate 95% credible intervals for each of the estimates of deaths delayed or averted under the  
200 counterfactual scenario.

**201 RESULTS****202 Differences in individual risk factors between rural and metropolitan areas**

1  
2  
3 203 There were a mixture of differences in dietary intake, between rural and metropolitan (Table 2), that  
4  
5 204 were statistically significant for many dietary components, although many were relatively small in  
6  
7 205 absolute magnitude. Two of the dietary intake levels were more favourable in rural areas, and the  
8  
9 206 rest were more favourable in metropolitan areas. Vegetable intakes were significantly higher for  
10  
11 207 rural populations ( $p < 0.001$ ), also resulting in a slightly higher fibre intake, while intake of fruit was  
12  
13 208 not significantly different between the two populations.

14  
15  
16 209 Energy intakes and the percentage of energy from saturated fat were significantly higher among  
17  
18 210 rural populations ( $p < 0.05$ ). Rural females reported a significantly higher dietary cholesterol intake  
19  
20 211 ( $p < 0.05$ ) and lower percentage energy from polyunsaturated fat ( $p < 0.01$ ) than their metropolitan  
21  
22 212 counterparts. There were no other significant differences in intake across the other dietary  
23  
24 213 components analysed.

25  
26  
27  
28 214 Mean alcohol intake (g/day) in those who reported drinking alcohol was significantly higher in rural  
29  
30 215 areas for females ( $p < 0.05$ ), however there was no differences for males. There were significantly  
31  
32 216 more current smokers in rural areas compared to major cities (females 19.5% vs 14.0%; males 24.2%  
33  
34 217 vs 18.7%). The proportion of people who had never smoked was higher in metropolitan areas.

35  
36  
37 218 Fewer rural people were meeting recommendations for physical activity; 37.1% of males in rural  
38  
39 219 areas were meeting recommendations compared to 44.0% in major cities. This was also true for  
40  
41 220 females (36.5% in rural areas, 46.3% in cities). There were no significant differences between the  
42  
43 221 two populations in the mean MET hours per week of moderate-vigorous activity performed by the  
44  
45 222 active population.

46  
47  
48 223 Smoking rates were significantly higher in rural areas for both females and males. Mean BMI for  
49  
50 224 females was significantly higher ( $p < 0.001$ ) in rural areas compared to major cities (females 26.8 vs  
51  
52 225 27.6 kg/m<sup>2</sup>; males 27.3 vs 27.8 kg/m<sup>2</sup>).

Table 2: Differences in individual risk factors, rural compared with metropolitan areas, females and males 2011-12, with 95% Confidence Intervals (CI).

| Dietary component          | Females                                     |                                    |                 |                  | Males                      |                                    |                 |                  |
|----------------------------|---------------------------------------------|------------------------------------|-----------------|------------------|----------------------------|------------------------------------|-----------------|------------------|
|                            | Mean intake (95%Confidence interval): Rural | Mean intake (95% CI): Metropolitan | Mean difference | p-value (t-test) | Mean intake (95%CI): Rural | Mean intake (95% CI): Metropolitan | Mean difference | p-value (t-test) |
| <b>Fruit (g)</b>           | 257 (250, 264)                              | 264 (258, 269)                     | 7               | p= NS            | 222 (214, 231)             | 231 (225, 237)                     | 9               | p=NS             |
| <b>Serves*</b>             | 1.7 serves                                  | 1.9 serves                         |                 |                  | 1.5 serves                 | 1.5 serves                         |                 |                  |
| <b>Vegetables (g)</b>      | 201 (196, 205)                              | 184 (180, 187)                     | 17              | p<0.0001         | 180 (176, 186)             | 158 ( 155, 176)                    | 23              | p<0.0001         |
| <b>Serves*</b>             | 2.7 serves                                  | 2.45 serves*                       |                 |                  | 2.4 serves                 | 2.1 serves                         |                 |                  |
| <b>Energy intake (kJ)</b>  | 8496 (8372, 8620)                           | 8332 (8241, 8424)                  | 164             | P=0.03           | 10,987 (10,818, 11,157)    | 10,760 (10,634, 10,887)            | 227             | p=0.03           |
| <b>Fibre (g)</b>           | 23.10 (23, 24)                              | 23 (23, 24)                        | 0.1             | p=NS             | 27.0 (26.3, 27.7)          | 26.6 (26.1, 27.0)                  | 0.4             | p=NS             |
| <b>Sodium (mg)</b>         | 2339 (2282, 2396)                           | 2279 (2236, 2320)                  | 61              | p=NS             | 3046 (2969, 3121)          | 2973 (2914, 3032)                  | 72              | p=NS             |
| <b>Dietary cholesterol</b> | 299 (289, 309)                              | 284 (277, 292)                     | 15              | p=0.02           | 380 (366, 393)             | 375 (363, 385)                     | 5               | p=NS             |



|                                   |                   |                   |     |          |                   |                   |     |          |
|-----------------------------------|-------------------|-------------------|-----|----------|-------------------|-------------------|-----|----------|
| (mg)                              |                   |                   |     |          |                   |                   |     |          |
| % energy from fat                 | 32 (31.7, 32.5)   | 32 (31.5, 32)     | 0.3 | p=NS     | 31.5 (31, 32)     | 31 (30.5, 31.1)   | 0.5 | p=0.01   |
| % energy from saturated fat       | 13.1 (12.8, 13.3) | 12.4 (12.2, 12.5) | 0.7 | p<0.0001 | 12.9 (12.7, 13.2) | 12.1 (11.9, 12.3) | 0.8 | p<0.0001 |
| % energy from monounsaturated fat | 12.0 (11.8, 12.1) | 12.1 (11.9, 12.3) | 0.1 | p=NS     | 12.0 (11.6, 12.0) | 12.0 (11.8, 12.1) | 0.1 | p=NS     |
| % energy from polyunsaturated fat | 4.8 (4.7, 4.9)    | 5.0 (5.0, 5.14)   | 0.2 | p=0.0016 | 4.6 (4.5, 4.7)    | 4.7 (4.6, 4.8)    | 0.1 | p=NS     |
| Alcohol intake (g)                | 21.6              | 17.5              | 4.1 | p=0.02   | 23.0              | 19.5              | 3.5 | p=NS     |
| % Current smokers                 | 17.4              | 12.5              | 4.9 | p=0.04   | 22.8              | 16                | 6.8 | p=0.002  |
| Physical activity (MET hours)     | 13.3              | 14.2              | 0.9 | p=NS     | 14.0              | 14.5              | 0.5 | p=NS     |

Notes: \*One serve of fruit is 150g, 1 serve of vegetables is 75g according to Australian dietary guidelines

### 1 Deaths from CVD and IHD averted or delayed by risk factor changes

2 In 2011, 13600 people aged 15 years and over died from CVD in rural areas, with 6846 and 6754  
3 deaths occurring in males and females respectively. In terms of premature deaths, 3137 of these  
4 deaths occurred in those aged under 75 years, 2200 in males, and 915 in females. IHD was the cause  
5 of 7560 deaths, with 2089 deaths occurring in those under 75 years (1636 Males, and 452 females).

6 In total, 1461 (1107, 1791) or 11% of all rural CVD deaths would be delayed or averted, if rural  
7 populations were to have the same levels of individual risk factors as their metropolitan  
8 counterparts (Table 3). Of the deaths prevented from CVD, 793 (510, 1065) would be from IHD,  
9 slightly more of these among males (418) than females (374), a 10.5% reduction in rural IHD deaths.  
10 Premature IHD deaths (75 years and under), would account for 38.3% of the IHD deaths that would  
11 be delayed or averted, or 4% of all rural IHD deaths. Most of these premature deaths would be  
12 averted for males, 266 (232, 301) compared to 37 (28, 46) in females.

13 There were 2075 excess IHD deaths in the rural population in 2011. In the counterfactual scenario,  
14 risk factors differences accounted for 38.2% of the gap, leaving 61.8% due to other, unmeasured  
15 factors. There were substantial differences by sex, with 28.1% of the gap attributable to risk factor  
16 differences for males, compared to 66.7% for females.

17  
18 *Table 3: Deaths averted or delayed from chronic diseases in rural Australia, under the*  
19 *counterfactual scenario, 95% credible intervals (CI), by sex.*

| Deaths         | Females (95% CI) | Males (95% CI) | Total (95% CI)    | % of total deaths<br>from condition<br>(based on 2011<br>death rate) |
|----------------|------------------|----------------|-------------------|----------------------------------------------------------------------|
| Overall CVD    | 828 (546, 1,092) | 629 (487, 768) | 1461 (1107, 1791) | 11%                                                                  |
| CVD (Under 75) | 78 (66, 88)      | 343 (305, 380) | 420 (375,465)     | 3%                                                                   |

|                      |               |                |                 |       |
|----------------------|---------------|----------------|-----------------|-------|
| years)               |               |                |                 |       |
| IHD                  | 375(147, 579) | 418 (280, 549) | 793 (506, 1065) | 10.5% |
| IHD (Under 75 years) | 37 (29, 46)   | 267 (231, 301) | 304 (263, 345)  | 4%    |

20

21 **Deaths attributable to individual risk factors**

22 Table 4 shows the number of deaths that would be delayed or averted under the counterfactual  
 23 scenario for each individual risk factor for both CVD and IHD. Obesity and smoking, as individual risk  
 24 factors, accounted for the largest numbers of CVD and IHD deaths that could be prevented in rural  
 25 areas, contributing 1,309 (1000, 1608), and 337 (290, 388) deaths delayed or averted respectively for  
 26 CVD, and 740 (504, 955) and 225 (192, 260) for IHD. The adjustment of fruit and vegetable intakes  
 27 showed that more people would die from CVD (-290 (-475, -103)) and IHD (-298 (95% CI: -486, -111))  
 28 if intakes in rural areas were to match those of metropolitan areas, since in this case vegetable  
 29 intakes would be worse under the counterfactual scenario.

30

31 *Table 4: Preventable deaths from CVD and IHD attributable to individual risk factors if*  
 32 *rural populations had the same risk factor levels as populations in major cities.*

| Risk factor          | Total CVD deaths averted/delayed under counterfactual scenario (95% CI) | Total IHD deaths averted/delayed under counterfactual scenario (95% CI) |
|----------------------|-------------------------------------------------------------------------|-------------------------------------------------------------------------|
| Overall diet         | -199 (-389, -10)                                                        | -190 (-380, -4)                                                         |
| Fruit and vegetables | -290 (-475,-103)                                                        | -298 (-486, -111)                                                       |
| Fibre                | -70 (-103, -39)                                                         | - 47 ( -75, -19)                                                        |
| Fats                 | 121 (98-145)                                                            | 133 (113-155)                                                           |
| Salt                 | 40 (17-62)                                                              | 19 (8-31)                                                               |

|                          |                  |               |
|--------------------------|------------------|---------------|
| <b>Physical activity</b> | 84 (66-103)      | 53 (38-69)    |
| <b>Smoking</b>           | 337 (290-388)    | 225 (192-260) |
| <b>Alcohol</b>           | -55 (-101, -18)  | -28 (-52, -5) |
| <b>Obesity</b>           | 1309 (100, 1608) | 740 (50, 955) |

33 *Note: positive numbers represent deaths delayed or averted under the counterfactual scenario, negative numbers represent*  
 34 *an increase in deaths under the counterfactual scenario.*

35 An additional 'best case' scenario was explored in which only risk factor changes that resulted in  
 36 improvements in cardiovascular mortality were modelled. As shown in table 4, changes to rural  
 37 vegetable, fibre and alcohol intakes to match those in major cities resulted in an increase in deaths  
 38 from CVD, therefore these three risk factors were held unchanged in the 'best case' scenario. Table 5  
 39 shows that in this scenario, a total of 1669 (1380, 1950) deaths could be delayed or averted in rural  
 40 areas. Of this total, 1161 (943, 1365) deaths would be averted from IHD, which would lead to a  
 41 mortality gap reduction of 56% (45.4%, 65.7 %) in rural Australia.

42 *Table 5: Deaths averted or delayed from chronic diseases in rural Australia, under the 'best case'*  
 43 *scenario, 95% credible intervals (CI), by sex.*

| <b>Deaths</b>                   | <b>Females (95% CI)</b> | <b>Males (95% CI)</b> | <b>Total (95% CI)</b> | <b>% of total deaths<br/>from condition</b> |
|---------------------------------|-------------------------|-----------------------|-----------------------|---------------------------------------------|
| <b>Overall CVD</b>              | 898 (628, 1154)         | 771 (702, 838)        | 1669 (1380, 1950)     | 12.2%                                       |
| <b>CVD (Under 75<br/>years)</b> | 74 (69, 78)             | 371 (343, 397)        | 445 (415,472)         | 3.4%                                        |
| <b>IHD</b>                      | 456 (245,644)           | 707(643,769)          | 1161 (943, 1365)      | 15.3%                                       |
| <b>IHD (Under 75<br/>years)</b> | 44 (40, 47)             | 309 (283, 333)        | 352 ( 327,377)        | 4.6%                                        |

44

45

## 46 **DISCUSSION**

47 This analysis showed that more than one third of the IHD mortality inequality between metro and  
 54 rural areas can be attributed to differences in individual risk factors, an important consideration for

1  
2  
3 49 health policy and intervention planning. Importantly, however, over 60% of the increased mortality  
4  
5 50 burden in rural areas was unexplained by risk factor differences.  
6  
7

8 51 The majority of individual risk factors were found to differ between rural and metropolitan areas,  
9  
10 52 with significantly higher BMI, energy intakes and proportion of energy intake from fats observed in  
11  
12 53 rural populations, along with higher levels of high risk alcohol consumption and sedentary  
13  
14 54 behaviour. Rural people did, however, report significantly higher vegetable intakes, which equated  
15  
16 55 to consumption of approximately 10% more vegetables than their metropolitan counterparts,  
17  
18 56 consistent with previous health survey data(2).  
19

20  
21 57 The origins of the differences in individual modifiable IHD risk factors between rural and  
22  
23 58 metropolitan areas(2), are likely to be complex, arising from the interaction of a range of factors at  
24  
25 59 the individual and community level, including socio-economic disadvantage, education levels, access  
26  
27 60 to primary health services and health literacy(28). Living outside of metropolitan areas has been  
28  
29 61 associated with more risk factors for chronic diseases in adults(25), with some evidence that  
30  
31 62 geographic location should be assessed as a social determinant of health, above and beyond socio-  
32  
33 63 economic status and area level disadvantage(26). There is evidence for this in that self-reported  
34  
35 64 prevalence of IHD, diabetes and cerebrovascular disease were found to be similar in rural and  
36  
37 65 metropolitan areas, despite much higher measured mortality rates from these diseases in rural  
38  
39 66 areas, potentially revealing reduced health awareness in rural populations(27). This may be an  
40  
41 67 important contributor to differences in outcomes for rural populations, as lower health literacy has  
42  
43 68 been linked to poorer outcomes in patients with heart disease(28).  
44  
45  
46  
47

48 69 In terms of individual risk factors, differences in obesity and tobacco smoking appeared to have the  
49  
50 70 biggest impact on the increased burden of IHD in the rural population, when compared to  
51  
52 71 metropolitan areas. Obesity is a well-known risk factor for IHD(15), and has been consistently shown  
53  
54 72 to be higher in rural populations of Australia for the past few decades(27, 29). Differences in energy  
55  
56 73 intake and physical activity energy expenditure between rural and metropolitan populations led to  
57  
58  
59  
60

1  
2  
3 74 substantial reductions in obesity-mediated mortality in the counterfactual scenario. These  
4  
5 75 reductions explained the largest proportion of the mortality gap between the two populations of any  
6  
7 76 of the behaviours studied. Higher energy intakes in the rural sample, which increase the likelihood  
8  
9 77 of a higher BMI(30), could be reflective of the consumption of more low cost, energy dense foods  
10  
11 78 possibly in part, due to reduced access to healthier foods, which has been well documented in rural  
12  
13 79 and regional areas(31).

14  
15  
16  
17 80 The cardio-protective effects of alcohol consumption are often debated(32). Our results showed that  
18  
19 81 current levels of alcohol intake do not appear to contribute to increased cardiovascular risk for rural  
20  
21 82 populations, with 55 fewer CVD deaths averted (an increase in deaths overall) as a result of the  
22  
23 83 difference in consumption between the two populations. This was mainly due to the fact that  
24  
25 84 although overall intakes were higher in rural areas, intakes among males over 75 years of age were  
26  
27 85 lower in rural areas than in metro areas, therefore leading to a modelled increase in consumption  
28  
29 86 and therefore associated deaths in this group under the counterfactual scenario.

30  
31  
32 87 Tobacco smoking is recognised as the largest single preventable cause of mortality and morbidity in  
33  
34 88 Australia(33), and higher smoking rates in rural areas have been apparent since at least 1993(16, 25).  
35  
36 89 Despite numerous public health initiatives and interventions over this period, the rural smoking rate  
37  
38 90 has remained comparatively high whilst the metropolitan rate has continued to decline(16, 33),  
39  
40 91 possibly indicating that such preventative efforts have not adequately reached rural Australians(16).

41  
42  
43 92 The results of this study suggest that substantial gains could be made in reducing the CVD mortality  
44  
45 93 gap between metropolitan and rural populations if modifiable risk factors could be improved in rural  
46  
47 94 areas. Improving risk factor profiles in rural populations to at least match that of their metropolitan  
48  
49 95 counterparts could be assumed to be a reasonable target, and is certainly a relatively modest goal,  
50  
51 96 given that even metropolitan risk factor levels are far from ideal(34, 35). Importantly, even if this risk  
52  
53 97 factor reduction scenario were to be achieved, a significant proportion (almost two-thirds) of the  
54  
55 98 excess deaths would remain, a finding which should prompt major reflection on the role of  
56  
57  
58  
59  
60

1  
2  
3 99 disadvantage, health care provision and other, less prominent risk factors in the perpetuation of  
4  
5 100 rural health inequalities.  
6  
7

8 101

9  
10  
11 102 **Strengths:**

12  
13 103 This study used three routinely collected, representative national datasets, including the Census,  
14  
15 104 AIHW National Mortality Database and the Australian Health Survey, as inputs for the PRIME model.  
16  
17 105 These datasets represent the highest quality, and comprehensive population data available currently  
18  
19 106 for Australia. The use of three robust datasets is required for PRIME to provide accurate disease  
20  
21 107 outputs. The PRIME model also has many strengths, including that it is able to model the effect of  
22  
23 108 changes in multiple risk factors simultaneously on mortality rates from different chronic diseases, by  
24  
25 109 age and sex. The model has been designed using the strongest available scientific evidence on the  
26  
27 110 links between chronic disease mortality and dietary intake, alcohol consumption, smoking, physical  
28  
29 111 activity and obesity levels(16).  
30  
31  
32

33 112 **Limitations:**

34  
35  
36 113 Data used in the model were self-reported, which carries multiple limitations, and could lead to  
37  
38 114 underestimations of the level of behavioural risk factors and subsequently, mortality gap reductions  
39  
40 115 (36), although it less likely that these biases would differentially affect rural vs metro populations.  
41  
42 116 Very remote areas of Australia were not sampled in AHS, therefore risk factor levels for these  
43  
44 117 populations were not included in the analysis(23). This may lead to an underestimation of the  
45  
46 118 prevalence of some risk factors, as residents of very remote areas are known to experience even  
47  
48 119 higher burden from IHD than the broader rural population(2), however they also represent a very  
49  
50 120 small percentage of the total Australian population (0.9%)(25). The uncertainty analysis conducted  
51  
52 121 on the number of deaths averted, only accounts for uncertainty within the model parameters, but  
53  
54 122 not the uncertainty of estimates from the Australian Health Survey. Lastly, we were unable to  
55  
56  
57  
58  
59  
60

1  
2  
3 123 account for the diversity in characteristics between differing levels of remoteness (e.g. inner regional  
4  
5 124 areas compared to outer regional or remote areas) due to small population numbers. Instead, it was  
6  
7 125 necessary to make a single comparison between those living within and outside major cities.  
8  
9 126 Differences in population characteristics, access to health services and environmental factors can  
10  
11 127 vary significantly by differing levels of remoteness, and this is an important consideration for policy  
12  
13 128 and planning when trying to improve health in non-metropolitan areas.

## 16 129 **CONCLUSIONS**

19 130 There is potential for improvements in the level of cardiovascular disease burden observed in rural  
20  
21 131 Australians, if the prevalence of modifiable risk factors such as obesity and smoking were to be  
22  
23 132 reduced to match those of metropolitan areas. If such a scenario was to be achieved, 38% of the  
24  
25 133 mortality gap between rural and metropolitan areas could be reduced, however, investigations into  
26  
27 134 factors responsible for the remaining 62% of this inequality are needed in order to work towards  
28  
29 135 achieving health equality for rural populations.

## 32 136 **Author Contributions**

33 137 LA organised access to and analysis of the raw data, completed all data entry into the PRIME model,  
34  
35 138 analysis of the results, and writing of the manuscript. MN contributed to defining the original  
36  
37 139 research idea, data collection, use of the PRIME model and analysis. KP and JJ assisted with data  
38  
39 140 analysis. SA contributed to defining the original research idea. All authors reviewed and contributed  
40  
41 141 to the manuscript and all stages of compilation.

42  
43  
44  
45  
46 142

## 48 143 **Acknowledgements**

49 144 Dr Peter Scarborough and team, who developed and provided the PRIME model used in this study.

50  
51 145

## 53 146 **Data Sharing Statement**

54  
55 147 The PRIME model is available upon request from Dr Peter Scarborough contactable at:  
56  
57 148 peter.scarsborough@dph.ox.ac.uk.



1  
2  
3 149 Population and health survey data were accessed through the Australian Bureau of Statistics  
4  
5 150 TableBuilder. The mortality data (ICD deaths by remoteness) were provided by the AIHW under a  
6  
7 151 specific data request.  
8  
9 152

10 153 **Conflict of Interest declaration**

11  
12 154 The authors declare there are no conflicts of interest  
13  
14 155

15 156 **Funding acknowledgments**

16  
17 157 MN, KP, LA and JJ are supported by funding from the National Heart Foundation of Australia and  
18  
19 158 Deakin University. SA is supported by funding from an Australian National Health and Medical  
20  
21 159 Research Council/ National Heart Foundation of Australia Career Development Fellowship  
22  
23 160 (APP1045836). He is also a researcher on the US National Institutes of Health grant titled, "Systems  
24  
25 161 Science to Guide Whole-of- Community Childhood Obesity Interventions" (1R01HL115485-01A1) and  
26  
27 162 within a NHMRC Centre for Research Excellence in Obesity Policy and Food Systems (APP1041020).  
28  
29  
30  
31 163  
32  
33 164  
34  
35 165  
36  
37 166  
38  
39  
40  
41  
42  
43  
44  
45  
46  
47  
48  
49  
50  
51  
52  
53  
54  
55  
56  
57  
58  
59  
60

## 167 REFERENCES:

- 168 1. AIHW. Mortality inequalities in Australia: bulletin 124. Canberra: AIHW; 2014.
- 169 2. ABS. Health Outside Major Cities Australia: ABS; 2011 [cited 2015 10/06/2015]. Available  
170 from: <http://www.abs.gov.au/AUSSTATS/abs@.nsf/Lookup/4102.0Main+Features30Mar+2011>.
- 171 3. Levin KA, Leyland AH. Urban-rural inequalities in ischemic heart disease in Scotland, 1981-  
172 1999. *Am J Public Health*. 2006 Jan;96(1):145-51.
- 173 4. Kulshreshtha A, Goyal A, Dabhadkar K, Veledar E, Vaccarino V. Urban-rural differences in  
174 coronary heart disease mortality in the United States: 1999-2009. *Public Health Rep*. 2014 Jan-  
175 Feb;129(1):19-29.
- 176 5. Terashima M, Rainham DG, Levy AR. A small-area analysis of inequalities in chronic disease  
177 prevalence across urban and non-urban communities in the Province of Nova Scotia, Canada, 2007-  
178 2011. *BMJ open*. 2014;4(5).
- 179 6. ABS. 3303.0 - Causes of Death, Australia, 2013 Australia: ABS; 2015 [cited 2016 29/02/2016].  
180 Available from:  
181 <http://www.abs.gov.au/ausstats/abs@.nsf/Lookup/by%20Subject/3303.0~2013~Main%20Features~>  
182 [Summary%20of%20findings~10000](http://www.abs.gov.au/ausstats/abs@.nsf/Lookup/by%20Subject/3303.0~2013~Main%20Features~Summary%20of%20findings~10000).
- 183 7. Dinh Vu H, Heller RF, Lim LLY, D'Este C, O'Connell RL. Mortality after acute myocardial  
184 infarction is lower in metropolitan regions than in non-metropolitan regions. *Journal of*  
185 *Epidemiology and Community Health*. 2000;54(8):590-5.
- 186 8. Waters AM, Trinh L, Chau T, Bourchier M, Moon L. Latest statistics on cardiovascular disease  
187 in Australia. *Clinical and Experimental Pharmacology and Physiology*. 2013;40(6):347-56.
- 188 9. Sexton PT, Sexton TLH. Excess coronary mortality among Australian men and women living  
189 outside the capital city statistical divisions. *Medical Journal of Australia*. 2000;172(8):370-4.
- 190 10. Beard JR, Earnest A, Morgan G, Chan H, Summerhayes R, Dunn TM, et al. Socioeconomic  
191 disadvantage and acute coronary events: A spatiotemporal analysis. *Epidemiology*. 2008;19(3):485-  
192 92.
- 193 11. Dobson A, McLaughlin D, Vagenas D, Wong KY. Why are death rates higher in rural areas?  
194 Evidence from the Australian Longitudinal Study on Women's Health. *Australian And New Zealand*  
195 *Journal Of Public Health*. 2010;34(6):624-8.
- 196 12. Gausia K, Katzenellenbogen JM, Sanfilippo FM, Knuiman MW, Thompson PL, Hobbs MST, et  
197 al. Evidence-based prescribing of drugs for secondary prevention of acute coronary syndrome in  
198 Aboriginal and non- Aboriginal patients admitted to Western Australian hospitals. *Internal Medicine*  
199 *Journal*. 2014;44(4):353-61.
- 200 13. Jordan S, Wilson A, Dobson A. Management of heart conditions in older rural and urban  
201 Australian women. *Internal Medicine Journal*. 2011;41(10):722-9.
- 202 14. NHRHA. The determinants of health in rural and remote Australia: fact sheet 28. Australian  
203 Capital Territory: National Rural Health Alliance; 2011.
- 204 15. WHF. World Heart Federation: 25 by 2025 Targets. Melbourne: World Heart Federation,  
205 2014.
- 206 16. NRHA. Smoking and rural health. Australian Capital Territory: National Rural Health Alliance;  
207 2014.
- 208 17. Scarborough P, Harrington RA, Mizdrak A, Zhou LM, Doherty A. The Preventable Risk  
209 Integrated Model and Its Use to Estimate the Health Impact of Public Health Policy Scenarios.  
210 *Scientifica*. 2014;2014:748750.
- 211 18. Scarborough P, Morgan RD, Webster P, Rayner M. Differences in coronary heart disease,  
212 stroke and cancer mortality rates between England, Wales, Scotland and Northern Ireland: the role  
213 of diet and nutrition. *BMJ open*. 2011 Jan 1;1(1):e000263.
- 214 19. Scarborough P, Allender S, Clarke D, Wickramasinghe K, Rayner M. Modelling the health  
215 impact of environmentally sustainable dietary scenarios in the UK. *European journal of clinical*  
216 *nutrition*. 2012 Jun;66(6):710-5.

- 1  
2  
3 217 20. Belanger M, Poirier M, Jbilou J, Scarborough P. Modelling the impact of compliance with  
4 218 dietary recommendations on cancer and cardiovascular disease mortality in Canada. Public health.  
5 219 2014 Mar;128(3):222-30.
- 6 220 21. ABS. Australian Statistical Geography Standard Canberra, Australia: ABS; 2014 [cited 2016  
7 221 04/07/2016]. Available from:  
8 222 [http://www.abs.gov.au/websitedbs/D3310114.nsf/home/Australian+Statistical+Geography+Standar](http://www.abs.gov.au/websitedbs/D3310114.nsf/home/Australian+Statistical+Geography+Standard+(ASGS))  
9 223 [d+\(ASGS\)](http://www.abs.gov.au/websitedbs/D3310114.nsf/home/Australian+Statistical+Geography+Standard+(ASGS)).
- 10 224 22. ABS. TableBuilder:How to apply for access to microdata Australia: Australian Bureau of  
11 225 Statistics; 2011 [updated 30 June 2017; cited 2017 17/07/2017]. Available from:  
12 226 <http://www.abs.gov.au/websitedbs/D3310114.nsf/home/About+TableBuilder>.
- 13 227 23. ABS. 4363.0.55.001 - Australian Health Survey: Users' Guide, 2011-13: Sample design and  
14 228 selection Canberra: Australian Bureau of Statistics; 2015 [cited 2016 20/06/2016]. Available from:  
15 229 <http://www.abs.gov.au/ausstats/abs@.nsf/Lookup/4363.0.55.001Chapter2102011-13>.
- 16 230 24. ABS. 4363.0.55.001 - Australian Health Survey: Users' Guide, 2011-13 : Adult Physical  
17 231 Activity: Australian Bureau of Statistics 2015 [cited 2016 27/06/2016]. Available from:  
18 232 [http://www.abs.gov.au/ausstats/abs@.nsf/Lookup/59FF6FE5D62BABE1CA257BAC00225A07?opend](http://www.abs.gov.au/ausstats/abs@.nsf/Lookup/59FF6FE5D62BABE1CA257BAC00225A07?opendocument)  
19 233 [ocument](http://www.abs.gov.au/ausstats/abs@.nsf/Lookup/59FF6FE5D62BABE1CA257BAC00225A07?opendocument).
- 20 234 25. 2014. AloHaW. Australia's health 2014: Australia's health series no. 14. Cat. no. AUS 178:  
21 235 Health in regional and remote areas. . Canberra, Australia: AIHW; 2014.
- 22 236 26. Patterson KA, Cleland V, Venn A, Blizzard L, Gall S. A cross-sectional study of geographic  
23 237 differences in health risk factors among young Australian adults: the role of socioeconomic position.  
24 238 BMC public health. 2014;14:1278.
- 25 239 27. AIHW. Rural, regional and remote health: Indicators of health status and determinants of  
26 240 health. Canberra, Australia: Australian Institute of Health and Welfare; 2008.
- 27 241 28. Wu JR, Moser DK, DeWalt DA, Rayens MK, Dracup K. Health Literacy Mediates the  
28 242 Relationship Between Age and Health Outcomes in Patients With Heart Failure. Circulation Heart  
29 243 failure. 2016 Jan;9(1):e002250.
- 30 244 29. NHRA. Obesity in rural Australia. Australian Capital Territory: National Rural Health Alliance;  
31 245 2013.
- 32 246 30. French SA, Story M, Jeffery RW. Environmental influences on eating and physical activity.  
33 247 Annual review of public health. 2001;22:309-35. PubMed PMID: 11274524.
- 34 248 31. health Q. 2014 Healthy food access basket survey, Queensland Queensland, Australia:  
35 249 Queensland Government; 2015 [cited 2016 22/06/2016]. Available from:  
36 250 <https://www.health.qld.gov.au/research-reports/reports/food/access/guidelines/default.asp>.
- 37 251 32. Ronksley PE, Brien SE, Turner BJ, Mukamal KJ, Ghali WA. Association of alcohol consumption  
38 252 with selected cardiovascular disease outcomes: a systematic review and meta-analysis. Bmj. 2011  
39 253 Feb 22;342:d671.
- 40 254 33. AIHW. Australia's health 2014: Leading types of ill health: AIHW; 2014 [cited 2016  
41 255 22/06/2016]. Available from: <http://www.aihw.gov.au/australias-health/2014/ill-health/#>.
- 42 256 34. Ball K, Mishra GD, Thane CW, A H. How well do Australian women comply with dietary  
43 257 guidelines? Public Health Nutrition 2004;4;7(3):443-52.
- 44 258 35. ABS. 4364.0.55.012 - Australian Health Survey: Consumption of Food Groups from the  
45 259 Australian Dietary Guidelines, 2011-12 Canberra, Asutra;oa: Australian Bureau of Statistics 2016  
46 260 [cited 2016 04/07/2016]. Available from:  
47 261 [http://www.abs.gov.au/websitedbs/D3310114.nsf/home/Australian+Statistical+Geography+Standar](http://www.abs.gov.au/websitedbs/D3310114.nsf/home/Australian+Statistical+Geography+Standard+(ASGS))  
48 262 [d+\(ASGS\)](http://www.abs.gov.au/websitedbs/D3310114.nsf/home/Australian+Statistical+Geography+Standard+(ASGS)).
- 49 263 36. ABS. 4363.0.55.001 - Australian Health Survey: Users' Guide, 2011-13: UNDER-REPORTING IN  
50 264 NUTRITION SURVEYS Canberra: Australian Bureau of statistics; 2015 [cited 2016 20/06/2016].  
51 265 Available from:  
52 266 <http://www.abs.gov.au/ausstats/abs@.nsf/Lookup/4363.0.55.001Chapter651512011-13>.

1  
2  
3 267  
4  
5 268  
6  
7  
8  
9  
10  
11  
12  
13  
14  
15  
16  
17  
18  
19  
20  
21  
22  
23  
24  
25  
26  
27  
28  
29  
30  
31  
32  
33  
34  
35  
36  
37  
38  
39  
40  
41  
42  
43  
44  
45  
46  
47  
48  
49  
50  
51  
52  
53  
54  
55  
56  
57  
58  
59  
60

For peer review only

# BMJ Open

**Quantifying the role of modifiable risk factors in the differences in cardiovascular disease mortality rates between metropolitan and rural populations in Australia: A macrosimulation modelling study.**

|                                 |                                                                                                                                                                                                                                                                                                           |
|---------------------------------|-----------------------------------------------------------------------------------------------------------------------------------------------------------------------------------------------------------------------------------------------------------------------------------------------------------|
| Journal:                        | <i>BMJ Open</i>                                                                                                                                                                                                                                                                                           |
| Manuscript ID                   | bmjopen-2017-018307.R2                                                                                                                                                                                                                                                                                    |
| Article Type:                   | Research                                                                                                                                                                                                                                                                                                  |
| Date Submitted by the Author:   | 19-Sep-2017                                                                                                                                                                                                                                                                                               |
| Complete List of Authors:       | Alston, Laura; Deakin University, Waterfront Campus<br>Peterson, Karen; Deakin University - Geelong Waterfront Campus<br>Jacobs, Jane; Deakin University - Geelong Waterfront Campus<br>Allender, Steven; Deakin University, Faculty of Health<br>Nichols, Melanie; Deakin University, Faculty of Health; |
| <b>Primary Subject Heading</b>: | Public health                                                                                                                                                                                                                                                                                             |
| Secondary Subject Heading:      | Epidemiology                                                                                                                                                                                                                                                                                              |
| Keywords:                       | Coronary heart disease < CARDIOLOGY, NUTRITION & DIETETICS, PREVENTIVE MEDICINE, PUBLIC HEALTH                                                                                                                                                                                                            |
|                                 |                                                                                                                                                                                                                                                                                                           |

SCHOLARONE™  
Manuscripts

1  
2  
3  
4  
5  
6  
7  
8  
9  
10  
11  
12  
13  
14  
15  
16  
17  
18  
19  
20  
21  
22  
23  
24  
25  
26  
27  
28  
29  
30  
31  
32  
33  
34  
35  
36  
37  
38  
39  
40  
41  
42  
43  
44  
45  
46  
47  
48  
49  
50  
51  
52  
53  
54  
55  
56  
57  
58  
59  
60

1 **TITLE:** Quantifying the role of modifiable risk factors in the differences in cardiovascular  
2 disease mortality rates between metropolitan and rural populations in Australia: A  
3 macrosimulation modelling study.

4 **Authors:** Laura Alston<sup>a</sup>, Karen Louise Peterson<sup>a</sup>, Jane P Jacobs<sup>a</sup>, Steven Allender<sup>a</sup>, Melanie  
5 Nichols<sup>a</sup>.

6 **Author affiliations:** <sup>a</sup>Global Obesity Centre, Faculty of Health, Deakin University, Geelong,  
7 Australia.

8 **Corresponding author:** Laura Alston. Address: WHO Collaborating Centre for Obesity  
9 Prevention, Faculty of Health, Deakin University, Locked Bag 20001, Geelong, VIC 3220  
10 Australia. Telephone: +61 3 5247 9426. Email: [laura.alston@deakin.edu.au](mailto:laura.alston@deakin.edu.au).

11 **Previous presentations of this research:** none to declare.

12 **Funding acknowledgments:** MN, KP, LA and JJ are supported by funding from the National  
13 Heart Foundation of Australia and Deakin University. SA is supported by funding from an  
14 Australian National Health and Medical Research Council/ National Heart Foundation of  
15 Australia Career Development Fellowship (APP1045836). He is also a researcher on the US  
16 National Institutes of Health grant titled, "Systems Science to Guide Whole-of- Community  
17 Childhood Obesity Interventions" (1R01HL115485-01A1) and within a NHMRC Centre for  
18 Research Excellence in Obesity Policy and Food Systems (APP1041020).

19

20 **Keywords:** Rural, Risk factors, Cardiovascular disease, Ischaemic heart disease, Inequalities,  
21 Prevention

22 **Word count (excluding references and abstract): 3,115 words**

23

24

1  
2  
3 25 **ABSTRACT**  
4

5 26 **Objectives:** Aims: (1) to quantify differences in modifiable risk factors between urban and rural  
6  
7  
8 27 populations, and (2) to determine the number of rural cardiovascular disease (CVD) and ischaemic  
9  
10 28 heart disease (IHD) deaths that could be averted or delayed if risk factor levels in rural areas were  
11  
12 29 equivalent to metropolitan areas.

13  
14  
15 30 **Setting:** National population estimates, risk factor prevalence, CVD and IHD deaths data were  
16  
17 31 analysed by rurality using the Preventable Risk Integrated Model (PRIME) macro-simulation chronic  
18  
19 32 disease risk model. Uncertainty analysis was conducted using a Monte Carlo simulation of 10,000  
20  
21 33 iterations to calculate 95% credible intervals (CI).  
22  
23

24 34 **Participants:** National datasets of males and females over the age of 18 years living in urban and  
25  
26 35 rural Australia.  
27  
28

29 36 **Results:** If people living in rural Australia had the same levels of risk factors as those in metropolitan  
30  
31 37 areas, approximately 1461 (95% credible interval (CI): 1107, 1791) deaths could be delayed from  
32  
33 38 cardiovascular disease (CVD) annually. Of these CVD deaths, 793 (95%CI: 506, 1065) would be from  
34  
35 39 IHD. The IHD mortality gap between metropolitan and rural populations would be reduced by 38.2%  
36  
37 40 (95%CI: 24.4%, 50.6%).  
38  
39

40 41 **Conclusions:** A significant portion of deaths from CVD and IHD could be averted with improvements  
41  
42 42 in risk factors; more than one third of the excess IHD deaths in rural Australia were attributed to  
43  
44 43 differences in risk factors. As much as two thirds of the increased IHD mortality rate in rural areas  
45  
46 44 could not be accounted for by modifiable risk factors, however, and this requires further  
47  
48 45 investigation.  
49  
50

51  
52 46  
53

54  
55 47  
56

57  
58 48  
59  
60

49 **ARTICLE SUMMARY:**50 *Strengths:*

- 51 • This is the first study to attempt to quantify the role of modifiable factors in the increased  
52 burden of cardiovascular diseases in rural areas when compared to urban Australia.
- 53 • The PRIME model has been previously published and is internationally recognised.
- 54 • This study used three representative national datasets, including the Census, Australian  
55 Institute of Health and Welfare National Mortality Database and the Australian Health  
56 Survey, as inputs for the PRIME model.

57 *Limitations:*

- 58 • Data used in the model were self-reported, and could lead to underestimations of the level  
59 of behavioural risk factors and subsequently, mortality gap reductions, although it is unlikely  
60 that these biases would differentially affect rural vs metro populations.
- 61 • Very remote populations of Australia (0.9% of the total population) were excluded.



1  
2  
3 71 **INTRODUCTION**  
4  
5

6 72 Despite high quality, universal health care systems and standards in Australia, there are still  
7  
8 73 disparities in the burden of chronic disease experienced by people with lower socio-economic status,  
9  
10 74 Aboriginal and Torres Strait Islanders and rural residents(1). Australians living outside major cities  
11  
12 75 experience a substantially increased burden of cardiovascular diseases(2), which is consistent with  
13  
14 76 findings for rural populations in other developed countries such as the United States, Canada, and  
15  
16 77 the United Kingdom(3-5). Cardiovascular disease (CVD), in its most common form, Ischaemic heart  
17  
18 78 disease (IHD) is the leading cause of death in Australia(6), and individuals residing in a regional or  
19  
20 79 remote areas are estimated to be between 1.2 and 1.5 times more likely to die from IHD than those  
21  
22 80 residing in metropolitan areas(1).  
23  
24  
25

26 81

27  
28 82 The reasons for observed health inequalities between metropolitan and rural populations appear to  
29  
30 83 be multifactorial and highly complex(2, 7-9). It has been hypothesised that rural populations  
31  
32 84 experience greater CVD and IHD burden due to variation in access to health services, individual  
33  
34 85 socio-economic status, rates of modifiable risk factors, as well as potentially reduced access to  
35  
36 86 specialised evidence-based treatments, such as prompt surgical intervention in rural hospitals(7, 10-  
37  
38 87 13). The National Rural Health Alliance (NRHA) of Australia states that if rural Australians are to  
39  
40 88 achieve the same health outcomes as their metropolitan counterparts by the year 2020, it is not just  
41  
42 89 access to health services that need to be improved(14), but that more focus needs to be placed on  
43  
44 90 improving the socio-economic determinants of health (such as lower education, incomes, and  
45  
46 91 employment) for rural communities, and reducing risk factors for chronic diseases such as smoking  
47  
48 92 and physical inactivity(14).  
49  
50  
51

52 93

53  
54  
55  
56 94  
57  
58  
59  
60

1  
2  
3 95 Cardiovascular diseases, particularly IHD, are largely preventable, and the modifiable, behavioural  
4  
5 96 risk factors are well known(15). Clinical risk factors such as high cholesterol, high blood pressure, and  
6  
7 97 obesity interact with behavioural factors such as poor diet, smoking, risky alcohol consumption, and  
8  
9 98 physical inactivity to increase the risk of IHD and CVD(13). Based on population health surveys, these  
10  
11 99 risk factors differ by rurality, with higher smoking rates, increased high risk alcohol consumption and  
12  
13  
14 100 lower physical activity levels being reported by non-city dwelling Australians(2).  
15  
16  
17 101  
18  
19  
20 102 Currently, there is minimal evidence quantifying the extent to which modifiable individual risk  
21  
22 103 factors contribute to the increased burden of CVD and IHD in rural areas, and how much of this  
23  
24 104 burden could be reduced if behavioural risk factors were comparable among rural Australians as  
25  
26 105 those among their counterparts in cities. Increased knowledge of how differential risk factor rates  
27  
28 106 contribute to the increased rural CVD burden could support the identification of policy priorities and  
29  
30 107 prevention programs for rural areas, as previous public health prevention efforts have been shown  
31  
32 108 to be less effective for rural populations compared to those living in metropolitan areas(16).  
33  
34  
35 109  
36  
37

#### 38 110 **Aims:**

39  
40  
41 111 This study aimed to: (1) Quantify differences in prevalence of major CVD risk factors between rural  
42  
43 112 and metropolitan populations, and (2) Determine the number and proportion of rural deaths from  
44  
45 113 CVD, and specifically from IHD, that could be averted or delayed in rural areas if the levels of risk  
46  
47 114 factors were equivalent to those in metropolitan Australia.  
48  
49  
50 115

#### 51 52 53 116 **METHODS**

##### 54 55 56 117 **The Preventable Risk Integrated Model (PRIME)** 57 58 59 60

1  
2  
3 118 This study used a macrosimulation model, the Preventable Risk Integrated Model (PRIME)(17), to  
4  
5 119 estimate age- and sex-specific changes in CVD and IHD mortality that would result from changes to  
6  
7 120 the population prevalence of risk factors in Australia. An exemption from ethics review was obtained  
8  
9 121 from Deakin University's Human Research Ethics Unit. PRIME has been used in the UK, New Zealand  
10  
11 122 and Canada to model a range of risk factor scenarios(17-20). The model can be used to examine the  
12  
13 123 likely changes in mortality rates of many chronic diseases, including IHD, under different  
14  
15 124 counterfactual scenarios of population behavioural risk factors(17).

16  
17  
18  
19 125 The PRIME model is built on a framework of linkage between, 1) modifiable behaviours; 2) clinical  
20  
21 126 risk factors; and 3) mortality outcomes. This framework is parameterised using the best available  
22  
23 127 evidence from meta-analyses of published studies, and is described in detail elsewhere(17). PRIME  
24  
25 128 requires data on prevalence of modifiable risk factors, mortality rates and population estimates by 5  
26  
27 129 year age groups and sex, for both baseline and counterfactual scenarios. For this study, PRIME was  
28  
29 130 used to estimate the number of CVD and IHD deaths that would be delayed or averted if those living  
30  
31 131 in rural Australia had the same modifiable risk factor levels as those living in major cities. The  
32  
33 132 baseline scenario used the current levels of modifiable risk factors in those living in rural areas, and  
34  
35 133 the counterfactual scenario involved applying the level of risk factors currently observed in the  
36  
37 134 metropolitan population. An additional 'best case' scenario was also modelled, by only changing risk  
38  
39 135 factor levels that were more favourable among those living in metropolitan areas, when compared  
40  
41 136 to the rural population.

#### 42 43 44 45 137 **Population data**

46  
47  
48 138 Population size estimates by age, sex and rurality were derived from the 2011 Australian Census.  
49  
50 139 The 'rural' population was defined as all residents not classified by the ABS as living in major  
51  
52 140 cities(21). These data were accessed through subscription to the online ABS data program  
53  
54 141 TableBuilder(22).

#### 55 56 57 142 **Risk factor data**

1  
2  
3 143 The individual modifiable risk factors included in the PRIME model (table 1) were; mean dietary  
4  
5 144 intakes, alcohol consumption, prevalence of smoking, physical activity levels and mean body mass  
6  
7 145 index (BMI) scores. All risk factor estimates were obtained from 9973 individuals aged 15 years and  
8  
9 146 over surveyed for the 2011-12 Australian Health Survey (AHS), which surveyed people from all areas  
10  
11 147 of Australia, excluding very remote areas(23). Mean values were calculated by age, sex and  
12  
13 148 remoteness for each risk factor parameter, through the ABS program TableBuilder(22).

149 *Table 1: Summary of risk factor data entered into the PRIME model.*

| Risk factor              | Parameter                                                       | Unit                     |
|--------------------------|-----------------------------------------------------------------|--------------------------|
| <b>Diet</b>              | Total energy intake                                             | Kcal/day                 |
|                          | Proportion of low/non-consumers of fruit (<1 serve/day)         | % of population          |
|                          | Proportion of low/non-consumers of vegetables (<1 serve/day)    | % of population          |
|                          | Mean vegetable consumption remaining population                 | g/day                    |
|                          | Mean fruit consumption remaining population                     | g/day                    |
|                          | Fibre consumption                                               | g/day                    |
|                          | Dietary cholesterol consumption                                 | mg/day                   |
|                          | Salt consumption                                                | g/day                    |
|                          | Total fat intake                                                | % of total energy intake |
|                          | Saturated fat intake                                            | % of total energy intake |
|                          | Mono-unsaturated fat intake                                     | % of total energy intake |
|                          | Poly-unsaturated fat intake                                     | % of total energy intake |
| <b>Alcohol</b>           | Proportion of low consumers (<1g/day)                           | % of population          |
|                          | Mean consumption among remaining population                     | g/day of pure alcohol    |
| <b>Smoking</b>           | Current smokers                                                 | % of population          |
|                          | Ex-smokers                                                      | % of population          |
|                          | Never smokers                                                   | % of population          |
| <b>Physical activity</b> | Proportion of population who are sedentary                      | % of population          |
|                          | Amount of moderate-vigorous activity among remaining population | MET-hours per week       |
| <b>Anthropometry</b>     | BMI                                                             | kg/m <sup>2</sup>        |
|                          | Height                                                          | metres                   |

150 *Abbreviations: BMI= Body Mass Index, g=grams, MET= metabolic equivalent task.*

151

152 Dietary intake data were collected using a 24-hour recall of all foods and fluids consumed in the day  
153 prior to the interview. Participants provided 24-hour recall data on two separate occasions, at least 8  
154 days apart. Implausible intakes were excluded if the day of intake data had an energy intake (EI) to

1  
2  
3 155 basal metabolic rate (BMR) ratio of less than 0.9, as per recommendation from the Australian  
4  
5 156 Bureau of Statistics(23). Mean daily dietary intakes from the two days of data collection were  
6  
7 157 calculated for each participant for: energy (kcal/day), fruit (g/day), vegetables (g/day), fibre (g/day),  
8  
9 158 dietary cholesterol (mg/day), salt (g/day), total fat (% EI), saturated fat (% EI), monounsaturated fat  
10  
11 159 (% EI), and polyunsaturated fat (% EI). The percentage of people who consumed less than one serve  
12  
13  
14 160 of fruit and less than one serve of vegetables was also calculated as required by the model. Mean  
15  
16 161 BMI for the rural population, by 5 year age group and sex, was required by the model, and the effect  
17  
18 162 of obesity on mortality rates was modelled using the differences in energy intake and physical  
19  
20 163 activity levels between the two populations. Participants reported if they were current smokers, ex-  
21  
22 164 smokers, or if they had never smoked, and the age- sex- and location-specific prevalence of each of  
23  
24 165 these categories were derived.

26  
27 166 The PRIME model requires the proportion of the population classified as 'sedentary', and physical  
28  
29 167 activity levels in the form of mean Metabolic Equivalent of Task (MET) hours per week, in the  
30  
31 168 remaining (active) population. The sedentary proportion of the population was calculated as the sum  
32  
33 169 of those classified as insufficiently active or sedentary by the ABS. Participants were classified as  
34  
35 170 insufficiently active or sedentary if they did not meet the physical activity recommendations of 150  
36  
37 171 minutes per week, over 5 separate sessions(24). Mean minutes of moderate and vigorous activity  
38  
39 172 over the last week were used to calculate average daily minutes of activity. This duration was then  
40  
41 173 multiplied by metabolic equivalents as provided by the ABS, to convert the estimates to MET-hours  
42  
43 174 of activity per week.

46  
47 175 The model requires the percentage of non-drinkers within each population by age and sex, which  
48  
49 176 was calculated as those who reported either no alcohol consumption, or <1g per day on average,  
50  
51 177 over the surveyed period. Mean daily intake of pure alcohol in millilitres (mL), by age group and sex,  
52  
53 178 was calculated as the weighted daily mean (mL) within TableBuilder, then converted to grams of  
54  
55 179 pure alcohol.  
56  
57  
58  
59  
60

1  
2  
3 180 **Mortality data**  
4

5 181 Deaths due to CVD (ICD-10 codes I00-I99 ) and IHD (ICD-10 code I20-I25) by state or territory and  
6  
7 182 remoteness area of usual residence, by sex and 5-year age group, among people aged 15 years and  
8  
9 183 over was provided by the Australian Institute of Health and Welfare (AIHW) for the year 2011 from  
10  
11 184 the AIHW National Mortality Database (unpublished). These data were provided after an application  
12  
13 185 for a specific request to the AIHW, and are not publicly available.  
14  
15

16  
17 186 **Mortality gap**  
18

19  
20 187 The mortality gap between rural and metropolitan areas was calculated by applying the  
21  
22 188 metropolitan death rate for those aged 15 years and over, to the rural population, to determine the  
23  
24 189 number of rural deaths that would be expected if cause-specific mortality rates were equal between  
25  
26 190 metropolitan and rural areas. This figure was subtracted from the actual number of deaths in rural  
27  
28 191 areas, to calculate the gap in mortality between the two populations.  
29  
30

31 192 **Uncertainty analysis**  
32

33  
34 193 The PRIME model has a built in Monte Carlo analysis function to generate 95% credible intervals  
35  
36 194 around the outputs, which allows for the different distribution of epidemiological parameters (for  
37  
38 195 example the level of relative risk for a disease outcome for a particular risk factor level) within the  
39  
40 196 model that have been derived from the literature(17).The intervals produced are based only on the  
41  
42 197 uncertainty in the model parameters, and not on the variability of the original data used in the  
43  
44 198 baseline and counterfactual scenarios. Monte Carlo simulation of 10,000 iterations was used to  
45  
46 199 generate 95% credible intervals for each of the estimates of deaths delayed or averted under the  
47  
48 200 counterfactual scenario.  
49  
50

51  
52 201 **RESULTS**  
53

54  
55 202 **Differences in individual risk factors between rural and metropolitan areas**  
56  
57  
58  
59  
60

1  
2  
3 203 There were a mixture of differences in dietary intake, between rural and metropolitan (Table 2), that  
4  
5 204 were statistically significant for many dietary components, although many were relatively small in  
6  
7 205 absolute magnitude. Two of the dietary intake levels were more favourable in rural areas, and the  
8  
9 206 rest were more favourable in metropolitan areas. Vegetable intakes were significantly higher for  
10  
11 207 rural populations ( $p < 0.001$ ), also resulting in a slightly higher fibre intake, while intake of fruit was  
12  
13 208 not significantly different between the two populations.

14  
15  
16 209 Energy intakes and the percentage of energy from saturated fat were significantly higher among  
17  
18 210 rural populations ( $p < 0.05$ ). Rural females reported a significantly higher dietary cholesterol intake  
19  
20 211 ( $p < 0.05$ ) and lower percentage energy from polyunsaturated fat ( $p < 0.01$ ) than their metropolitan  
21  
22 212 counterparts. There were no other significant differences in intake across the other dietary  
23  
24 213 components analysed.

25  
26  
27  
28 214 Mean alcohol intake (g/day) in those who reported drinking alcohol was significantly higher in rural  
29  
30 215 areas for females ( $p < 0.05$ ), however there was no differences for males. There were significantly  
31  
32 216 more current smokers in rural areas compared to major cities (females 19.5% vs 14.0%; males 24.2%  
33  
34 217 vs 18.7%). The proportion of people who had never smoked was higher in metropolitan areas.

35  
36  
37 218 Fewer rural people were meeting recommendations for physical activity; 37.1% of males in rural  
38  
39 219 areas were meeting recommendations compared to 44.0% in major cities. This was also true for  
40  
41 220 females (36.5% in rural areas, 46.3% in cities). There were no significant differences between the  
42  
43 221 two populations in the mean MET hours per week of moderate-vigorous activity performed by the  
44  
45 222 active population.

46  
47  
48 223 Smoking rates were significantly higher in rural areas for both females and males. Mean BMI for  
49  
50 224 females was significantly higher ( $p < 0.001$ ) in rural areas compared to major cities (females 26.8 vs  
51  
52 225 27.6 kg/m<sup>2</sup>; males 27.3 vs 27.8 kg/m<sup>2</sup>).

226 *Table 2: Differences in individual risk factors, rural compared with metropolitan areas, females and males 2011-12, with 95% Confidence*  
 227 *Intervals (CI).*

| Dietary component          | Females                                     |                                    |                 |                  | Males                      |                                    |                 |                  |
|----------------------------|---------------------------------------------|------------------------------------|-----------------|------------------|----------------------------|------------------------------------|-----------------|------------------|
|                            | Mean intake (95%Confidence interval): Rural | Mean intake (95% CI): Metropolitan | Mean difference | p-value (t-test) | Mean intake (95%CI): Rural | Mean intake (95% CI): Metropolitan | Mean difference | p-value (t-test) |
| <b>Fruit (g)</b>           | 257 (250, 264)                              | 264 (258, 269)                     | 7               | p= NS            | 222 (214, 231)             | 231 (225, 237)                     | 9               | p=NS             |
| <b>Serves*</b>             | 1.7 serves                                  | 1.9 serves                         |                 |                  | 1.5 serves                 | 1.5 serves                         |                 |                  |
| <b>Vegetables (g)</b>      | 201 (196, 205)                              | 184 (180, 187)                     | 17              | p<0.0001         | 180 (176, 186)             | 158 ( 155, 176)                    | 23              | p<0.0001         |
| <b>Serves*</b>             | 2.7 serves                                  | 2.45 serves*                       |                 |                  | 2.4 serves                 | 2.1 serves                         |                 |                  |
| <b>Energy intake (kJ)</b>  | 8496 (8372, 8620)                           | 8332 (8241, 8424)                  | 164             | P=0.03           | 10,987 (10,818, 11,157)    | 10,760 (10,634, 10,887)            | 227             | p=0.03           |
| <b>Fibre (g)</b>           | 23.10 (23, 24)                              | 23 (23, 24)                        | 0.1             | p=NS             | 27.0 (26.3, 27.7)          | 26.6 (26.1, 27.0)                  | 0.4             | p=NS             |
| <b>Sodium (mg)</b>         | 2339 (2282, 2396)                           | 2279 (2236, 2320)                  | 61              | p=NS             | 3046 (2969, 3121)          | 2973 (2914, 3032)                  | 72              | p=NS             |
| <b>Dietary cholesterol</b> | 299 (289, 309)                              | 284 (277, 292)                     | 15              | p=0.02           | 380 (366, 393)             | 375 (363, 385)                     | 5               | p=NS             |



|                                   |                   |                   |     |          |                   |                   |     |          |
|-----------------------------------|-------------------|-------------------|-----|----------|-------------------|-------------------|-----|----------|
| (mg)                              |                   |                   |     |          |                   |                   |     |          |
| % energy from fat                 | 32 (31.7, 32.5)   | 32 (31.5, 32)     | 0.3 | p=NS     | 31.5 (31, 32)     | 31 (30.5, 31.1)   | 0.5 | p=0.01   |
| % energy from saturated fat       | 13.1 (12.8, 13.3) | 12.4 (12.2, 12.5) | 0.7 | p<0.0001 | 12.9 (12.7, 13.2) | 12.1 (11.9, 12.3) | 0.8 | p<0.0001 |
| % energy from monounsaturated fat | 12.0 (11.8, 12.1) | 12.1 (11.9, 12.3) | 0.1 | p=NS     | 12.0 (11.6, 12.0) | 12.0 (11.8, 12.1) | 0.1 | p=NS     |
| % energy from polyunsaturated fat | 4.8 (4.7, 4.9)    | 5.0 (5.0, 5.14)   | 0.2 | p=0.0016 | 4.6 (4.5, 4.7)    | 4.7 (4.6, 4.8)    | 0.1 | p=NS     |
| Alcohol intake (g)                | 21.6              | 17.5              | 4.1 | p=0.02   | 23.0              | 19.5              | 3.5 | p=NS     |
| % Current smokers                 | 17.4              | 12.5              | 4.9 | p=0.04   | 22.8              | 16                | 6.8 | p=0.002  |
| Physical activity (MET hours)     | 13.3              | 14.2              | 0.9 | p=NS     | 14.0              | 14.5              | 0.5 | p=NS     |

228 Notes: \*One serve of fruit is 150g, 1 serve of vegetables is 75g according to Australian dietary guidelines

229 **Deaths from CVD and IHD averted or delayed by risk factor changes**

230 In 2011, 13600 people aged 15 years and over died from CVD in rural areas, with 6846 and 6754  
 231 deaths occurring in males and females respectively. In terms of premature deaths, 3137 of these  
 232 deaths occurred in those aged under 75 years, 2200 in males, and 915 in females. IHD was the cause  
 233 of 7560 deaths, with 2089 deaths occurring in those under 75 years (1636 Males, and 452 females).  
 234 In total, 1461 (1107, 1791) or 11% of all rural CVD deaths would be delayed or averted, if rural  
 235 populations were to have the same levels of individual risk factors as their metropolitan  
 236 counterparts (Table 3). Of the deaths prevented from CVD, 793 (510, 1065) would be from IHD,  
 237 slightly more of these among males (418) than females (374), a 10.5% reduction in rural IHD deaths.  
 238 Premature IHD deaths (75 years and under), would account for 38.3% of the IHD deaths that would  
 239 be delayed or averted, or 4% of all rural IHD deaths. Most of these premature deaths would be  
 240 averted for males, 266 (232, 301) compared to 37 (28, 46) in females.

241

242 *Table 3: Deaths averted or delayed from chronic diseases in rural Australia, under the*  
 243 *counterfactual scenario, 95% credible intervals (CI), by sex.*

|                          | Deaths | Averted or delayed deaths (%<br>of total deaths in the<br>category) |
|--------------------------|--------|---------------------------------------------------------------------|
| <b>CVD all ages</b>      |        |                                                                     |
| All                      | 13,600 | 1,461 (10.7)                                                        |
| Male                     | 6,846  | 629 (9.2)                                                           |
| Female                   | 6754   | 828 (12.3)                                                          |
| <b>CVD &lt; 75 years</b> |        |                                                                     |
| All                      | 3,137  | 420 (13.4)                                                          |
| Male                     | 2,200  | 343 (15.6)                                                          |
| Female                   | 915    | 78 (8.5)                                                            |
| <b>IHD all ages</b>      |        |                                                                     |
| All                      | 7,560  | 793 (10.5)                                                          |
| Male                     | 4,367  | 418 (9.6)                                                           |
| Female                   | 3,193  | 374 (11.7)                                                          |
| <b>IHD &lt; 75 years</b> |        |                                                                     |
| All                      | 2,089  | 304 (14.6)                                                          |
| Male                     | 1,636  | 267(16.3)                                                           |
| Female                   | 452    | 37 (8.2)                                                            |

244 Notes: < 75 years: under 75 years of age.

245 There were the equivalent of 2075 more IHD deaths in the rural population when compared to the  
 246 metropolitan population in 2011 (data not shown). In the counterfactual scenario, risk factor  
 247 differences accounted for 38.2% of the gap, leaving 61.8% due to other, unmeasured factors. There  
 248 were substantial differences by sex, with 28.1% of the gap attributable to risk factor differences for  
 249 males, compared to 66.7% for females.

#### 250 **Deaths attributable to individual risk factors**

251 Table 4 shows the number of deaths that would be delayed or averted under the counterfactual  
 252 scenario for each individual risk factor for both CVD and IHD. Obesity and smoking, as individual risk  
 253 factors, accounted for the largest numbers of CVD and IHD deaths that could be prevented in rural  
 254 areas, contributing 1,309 (1000, 1608), and 337 (290, 388) deaths delayed or averted respectively for  
 255 CVD, and 740 (504, 955) and 225 (192, 260) for IHD. The adjustment of fruit and vegetable intakes  
 256 showed that more people would die from CVD (-290 (-475, -103)) and IHD (-298 (95% CI: -486, -111))  
 257 if intakes in rural areas were to match those of metropolitan areas, since in this case vegetable  
 258 intakes would be worse under the counterfactual scenario.

259

260 *Table 4: Preventable deaths from CVD and IHD attributable to individual risk factors if*  
 261 *rural populations had the same risk factor levels as populations in major cities.*

| Risk factor          | Total CVD deaths averted/delayed under counterfactual scenario (95% CI) | Total IHD deaths averted/delayed under counterfactual scenario (95% CI) |
|----------------------|-------------------------------------------------------------------------|-------------------------------------------------------------------------|
| Overall diet         | -199 (-389, -10)                                                        | -190 (-380, -4)                                                         |
| Fruit and vegetables | -290 (-475, -103)                                                       | -298 (-486, -111)                                                       |
| Fibre                | -70 (-103, -39)                                                         | -47 (-75, -19)                                                          |
| Fats                 | 121 (98-145)                                                            | 133 (113-155)                                                           |
| Salt                 | 40 (17-62)                                                              | 19 (8-31)                                                               |

|                          |                  |               |
|--------------------------|------------------|---------------|
| <b>Physical activity</b> | 84 (66-103)      | 53 (38-69)    |
| <b>Smoking</b>           | 337 (290-388)    | 225 (192-260) |
| <b>Alcohol</b>           | -55 (-101, -18)  | -28 (-52, -5) |
| <b>Obesity</b>           | 1309 (100, 1608) | 740 (50, 955) |

262 *Note: positive numbers represent deaths delayed or averted under the counterfactual scenario, negative numbers represent*  
 263 *an increase in deaths under the counterfactual scenario.*

264 An additional 'best case' scenario was explored in which only risk factor changes that resulted in  
 265 improvements in cardiovascular mortality were modelled. As shown in table 4, changes to rural  
 266 vegetable, fibre and alcohol intakes to match those in major cities resulted in an increase in deaths  
 267 from CVD, therefore these three risk factors were held unchanged in the 'best case' scenario. Table 5  
 268 shows that in this scenario, a total of 1669 (1380, 1950) deaths could be delayed or averted in rural  
 269 areas. Of this total, 1161 (943, 1365) deaths would be averted from IHD, which would lead to a  
 270 mortality gap reduction of 56% (45.4%, 65.7 %) in rural Australia.

271 *Table 5: Deaths averted or delayed from chronic diseases in rural Australia, under the 'best case'*  
 272 *scenario, 95% credible intervals (CI), by sex.*

|                          | <b>Averted or delayed deaths (% of total deaths in the category) best case</b> |
|--------------------------|--------------------------------------------------------------------------------|
| <b>CVD all ages</b>      |                                                                                |
| <b>All</b>               | 1,669 (12.2)                                                                   |
| <b>Male</b>              | 771 (11.2)                                                                     |
| <b>Female</b>            | 898 (13.3)                                                                     |
| <b>CVD &lt;75 years</b>  |                                                                                |
| <b>All</b>               | 445 (14.2)                                                                     |
| <b>Male</b>              | 371 (16.8)                                                                     |
| <b>Female</b>            | 74 (8.0)                                                                       |
| <b>IHD all ages</b>      |                                                                                |
| <b>All</b>               | 1161 (15.3)                                                                    |
| <b>Male</b>              | 707 (16.2)                                                                     |
| <b>Female</b>            | 456 (14.2)                                                                     |
| <b>IHD &lt; 75 years</b> |                                                                                |
| <b>All</b>               | 352(16.9)                                                                      |
| <b>Male</b>              | 309 (18.9)                                                                     |
| <b>Female</b>            | 44(9.7)                                                                        |

273 *Notes: < 75 years: under 75 years of age.*

274

275 **DISCUSSION**

1  
2  
3 276 This analysis showed that more than one third of the IHD mortality inequality between metro and  
4  
5 277 rural areas can be attributed to differences in individual risk factors, an important consideration for  
6  
7 278 health policy and intervention planning. Importantly, however, over 60% of the increased mortality  
8  
9 279 burden in rural areas was unexplained by risk factor differences.  
10

11  
12 280 The majority of individual risk factors were found to differ between rural and metropolitan areas,  
13  
14 281 with significantly higher BMI, energy intakes and proportion of energy intake from fats observed in  
15  
16 282 rural populations, along with higher levels of high risk alcohol consumption and sedentary  
17  
18 283 behaviour. Rural people did, however, report significantly higher vegetable intakes, which equated  
19  
20 284 to consumption of approximately 10% more vegetables than their metropolitan counterparts,  
21  
22 285 consistent with previous health survey data(2).  
23

24  
25  
26 286 The origins of the differences in individual modifiable IHD risk factors between rural and  
27  
28 287 metropolitan areas(2), are likely to be complex, arising from the interaction of a range of factors at  
29  
30 288 the individual and community level, including socio-economic disadvantage, education levels, access  
31  
32 289 to primary health services and health literacy(28). Living outside of metropolitan areas has been  
33  
34 290 associated with more risk factors for chronic diseases in adults(25), with some evidence that  
35  
36 291 geographic location should be assessed as a social determinant of health, above and beyond socio-  
37  
38 292 economic status and area level disadvantage(26). There is evidence for this in that self-reported  
39  
40 293 prevalence of IHD, diabetes and cerebrovascular disease were found to be similar in rural and  
41  
42 294 metropolitan areas, despite much higher measured mortality rates from these diseases in rural  
43  
44 295 areas, potentially revealing reduced health awareness in rural populations(27). This may be an  
45  
46 296 important contributor to differences in outcomes for rural populations, as lower health literacy has  
47  
48 297 been linked to poorer outcomes in patients with heart disease(28).  
49

50  
51  
52 298 In terms of individual risk factors, differences in obesity and tobacco smoking appeared to have the  
53  
54 299 biggest impact on the increased burden of IHD in the rural population, when compared to  
55  
56 300 metropolitan areas. Obesity is a well-known risk factor for IHD(15), and has been consistently shown  
57  
58  
59  
60

1  
2  
3 301 to be higher in rural populations of Australia for the past few decades(27, 29). Differences in energy  
4  
5 302 intake and physical activity energy expenditure between rural and metropolitan populations led to  
6  
7 303 substantial reductions in obesity-mediated mortality in the counterfactual scenario. These  
8  
9 304 reductions explained the largest proportion of the mortality gap between the two populations of any  
10  
11 305 of the behaviours studied. Higher energy intakes in the rural sample, which increase the likelihood  
12  
13 306 of a higher BMI(30), could be reflective of the consumption of more low cost, energy dense foods  
14  
15 307 possibly in part, due to reduced access to healthier foods, which has been well documented in rural  
16  
17 308 and regional areas(31).

20  
21 309 The cardio-protective effects of alcohol consumption are often debated(32). Our results showed that  
22  
23 310 current levels of alcohol intake do not appear to contribute to increased cardiovascular risk for rural  
24  
25 311 populations, with 55 fewer CVD deaths averted (an increase in deaths overall) as a result of the  
26  
27 312 difference in consumption between the two populations. This was mainly due to the fact that  
28  
29 313 although overall intakes were higher in rural areas, intakes among males over 75 years of age were  
30  
31 314 lower in rural areas than in metro areas, therefore leading to a modelled increase in consumption  
32  
33 315 and therefore associated deaths in this group under the counterfactual scenario.

36  
37 316 Tobacco smoking is recognised as the largest single preventable cause of mortality and morbidity in  
38  
39 317 Australia(33), and higher smoking rates in rural areas have been apparent since at least 1993(16, 25).  
40  
41 318 Despite numerous public health initiatives and interventions over this period, the rural smoking rate  
42  
43 319 has remained comparatively high whilst the metropolitan rate has continued to decline(16, 33),  
44  
45 320 possibly indicating that such preventative efforts have not adequately reached rural Australians(16).

48  
49 321 The results of this study suggest that substantial gains could be made in reducing the CVD mortality  
50  
51 322 gap between metropolitan and rural populations if modifiable risk factors could be improved in rural  
52  
53 323 areas. Improving risk factor profiles in rural populations to at least match that of their metropolitan  
54  
55 324 counterparts could be assumed to be a reasonable target, and is certainly a relatively modest goal,  
56  
57 325 given that even metropolitan risk factor levels are far from ideal(34, 35). Under the 'best case

1  
2  
3 326 scenario', if only unfavourable risk factors in rural areas were changed, (for example, vegetable  
4  
5 327 intakes left the same), approximately 200 additional CVD deaths to the counterfactual scenario  
6  
7 328 could be prevented every year. Targeting the unfavourable risk factors, such as smoking and obesity  
8  
9 329 in rural people, could be modest and achievable targets for health policy and/or community  
10  
11 330 interventions in order to reduce the rural death rate to be closer to the levels observed in  
12  
13 331 metropolitan areas. Importantly, even if the counterfactual risk factor reduction scenario were to be  
14  
15 332 achieved, a significant proportion (almost two-thirds) of the excess deaths would remain, a finding  
16  
17 333 which should prompt major reflection on the role of disadvantage, health care provision and other,  
18  
19 334 less prominent risk factors in the perpetuation of rural health inequalities.  
20  
21  
22  
23  
24  
25

335

**336 Strengths:**

26  
27  
28 337 This study used three routinely collected, representative national datasets, including the Census,  
29  
30 338 AIHW National Mortality Database and the Australian Health Survey, as inputs for the PRIME model.  
31  
32 339 These datasets represent the highest quality, and comprehensive population data available currently  
33  
34 340 for Australia. The use of three robust datasets is required for PRIME to provide accurate disease  
35  
36 341 outputs. The PRIME model also has many strengths, including that it is able to model the effect of  
37  
38 342 changes in multiple risk factors simultaneously on mortality rates from different chronic diseases, by  
39  
40 343 age and sex. The model has been designed using the strongest available scientific evidence on the  
41  
42 344 links between chronic disease mortality and dietary intake, alcohol consumption, smoking, physical  
43  
44 345 activity and obesity levels(16).  
45  
46  
47

**346 Limitations:**

48  
49 347 Data used in the model were self-reported, which carries multiple limitations, and could lead to  
50  
51 348 underestimations of the level of behavioural risk factors and subsequently, mortality gap reductions  
52  
53 349 (36), although it less likely that these biases would differentially affect rural vs metro populations.  
54  
55  
56  
57  
58  
59  
60

1  
2  
3 350 Very remote areas of Australia were not sampled in AHS, therefore risk factor levels for these  
4  
5 351 populations were not included in the analysis(23). This may lead to an underestimation of the  
6  
7 352 prevalence of some risk factors, as residents of very remote areas are known to experience even  
8  
9 353 higher burden from IHD than the broader rural population(2), however they also represent a very  
10  
11 354 small percentage of the total Australian population (0.9%)(25). The uncertainty analysis conducted  
12  
13 355 on the number of deaths averted, only accounts for uncertainty within the model parameters, but  
14  
15 356 not the uncertainty of estimates from the Australian Health Survey. Lastly, we were unable to  
16  
17 357 account for the diversity in characteristics between differing levels of remoteness (e.g. inner regional  
18  
19 358 areas compared to outer regional or remote areas) due to small population numbers. Instead, it was  
20  
21 359 necessary to make a single comparison between those living within and outside major cities.  
22  
23 360 Differences in population characteristics, access to health services and environmental factors can  
24  
25 361 vary significantly by differing levels of remoteness, and this is an important consideration for policy  
26  
27 362 and planning when trying to improve health in non-metropolitan areas.  
28  
29  
30

### 31 **CONCLUSIONS**

32  
33  
34 364 There is potential for improvements in the level of cardiovascular disease burden observed in rural  
35  
36 365 Australians, if the prevalence of modifiable risk factors such as obesity and smoking were to be  
37  
38 366 reduced to match those of metropolitan areas. If such a scenario was to be achieved, 38% of the  
39  
40 367 mortality gap between rural and metropolitan areas could be reduced, however, investigations into  
41  
42 368 factors responsible for the remaining 62% of this inequality are needed in order to work towards  
43  
44 369 achieving health equality for rural populations.  
45  
46  
47

### 48 **Author Contributions**

49  
50 371 LA organised access to and analysis of the raw data, completed all data entry into the PRIME model,  
51  
52 372 analysis of the results, and writing of the manuscript. MN contributed to defining the original  
53  
54 373 research idea, data collection, use of the PRIME model and analysis. KP and JJ assisted with data  
55  
56  
57  
58  
59  
60



1  
2  
3 374 analysis. SA contributed to defining the original research idea. All authors reviewed and contributed  
4  
5 375 to the manuscript and all stages of compilation.  
6  
7

8 376

9  
10 377 **Acknowledgements**

11 378 Dr Peter Scarborough and team, who developed and provided the PRIME model used in this study.  
12  
13 379

14  
15 380 **Data Sharing Statement**

16  
17 381 The PRIME model is available upon request from Dr Peter Scarborough contactable at:

18 382 peter.scarsborough@dph.ox.ac.uk.  
19  
20

21 383 Population and health survey data were accessed through the Australian Bureau of Statistics

22 384 TableBuilder. The mortality data (ICD deaths by remoteness) were provided by the AIHW under a

23  
24 385 specific data request.  
25  
26 386

27  
28 387 **Conflict of Interest declaration**

29 388 The authors declare there are no conflicts of interest  
30  
31 389

32  
33 390 **Funding acknowledgments**

34  
35 391 MN, KP, LA and JJ are supported by funding from the National Heart Foundation of Australia and

36  
37 392 Deakin University. SA is supported by funding from an Australian National Health and Medical

38  
39 393 Research Council/ National Heart Foundation of Australia Career Development Fellowship

40  
41 394 (APP1045836). He is also a researcher on the US National Institutes of Health grant titled, "Systems

42  
43 395 Science to Guide Whole-of- Community Childhood Obesity Interventions" (1R01HL115485-01A1) and

44  
45 396 within a NHMRC Centre for Research Excellence in Obesity Policy and Food Systems (APP1041020).  
46  
47  
48 397

49 398

50 399

51 400

52  
53  
54  
55  
56  
57  
58  
59  
60

## 401 REFERENCES:

- 402 1. AIHW. Mortality inequalities in Australia: bulletin 124. Canberra: AIHW; 2014.
- 403 2. ABS. Health Outside Major Cities Australia: ABS; 2011 [cited 2015 10/06/2015]. Available  
404 from: <http://www.abs.gov.au/AUSSTATS/abs@.nsf/Lookup/4102.0Main+Features30Mar+2011>.
- 405 3. Levin KA, Leyland AH. Urban-rural inequalities in ischemic heart disease in Scotland, 1981-  
406 1999. *Am J Public Health*. 2006 Jan;96(1):145-51.
- 407 4. Kulshreshtha A, Goyal A, Dabhadkar K, Veledar E, Vaccarino V. Urban-rural differences in  
408 coronary heart disease mortality in the United States: 1999-2009. *Public Health Rep*. 2014 Jan-  
409 Feb;129(1):19-29.
- 410 5. Terashima M, Rainham DG, Levy AR. A small-area analysis of inequalities in chronic disease  
411 prevalence across urban and non-urban communities in the Province of Nova Scotia, Canada, 2007-  
412 2011. *BMJ open*. 2014;4(5).
- 413 6. ABS. 3303.0 - Causes of Death, Australia, 2013 Australia: ABS; 2015 [cited 2016 29/02/2016].  
414 Available from:  
415 [http://www.abs.gov.au/ausstats/abs@.nsf/Lookup/by%20Subject/3303.0~2013~Main%20Features~](http://www.abs.gov.au/ausstats/abs@.nsf/Lookup/by%20Subject/3303.0~2013~Main%20Features~Summary%20of%20findings~10000)  
416 [Summary%20of%20findings~10000](http://www.abs.gov.au/ausstats/abs@.nsf/Lookup/by%20Subject/3303.0~2013~Main%20Features~Summary%20of%20findings~10000).
- 417 7. Dinh Vu H, Heller RF, Lim LLY, D'Este C, O'Connell RL. Mortality after acute myocardial  
418 infarction is lower in metropolitan regions than in non-metropolitan regions. *Journal of*  
419 *Epidemiology and Community Health*. 2000;54(8):590-5.
- 420 8. Waters AM, Trinh L, Chau T, Bourchier M, Moon L. Latest statistics on cardiovascular disease  
421 in Australia. *Clinical and Experimental Pharmacology and Physiology*. 2013;40(6):347-56.
- 422 9. Sexton PT, Sexton TLH. Excess coronary mortality among Australian men and women living  
423 outside the capital city statistical divisions. *Medical Journal of Australia*. 2000;172(8):370-4.
- 424 10. Beard JR, Earnest A, Morgan G, Chan H, Summerhayes R, Dunn TM, et al. Socioeconomic  
425 disadvantage and acute coronary events: A spatiotemporal analysis. *Epidemiology*. 2008;19(3):485-  
426 92.
- 427 11. Dobson A, McLaughlin D, Vagenas D, Wong KY. Why are death rates higher in rural areas?  
428 Evidence from the Australian Longitudinal Study on Women's Health. *Australian And New Zealand*  
429 *Journal Of Public Health*. 2010;34(6):624-8.
- 430 12. Gausia K, Katzenellenbogen JM, Sanfilippo FM, Knuiman MW, Thompson PL, Hobbs MST, et  
431 al. Evidence-based prescribing of drugs for secondary prevention of acute coronary syndrome in  
432 Aboriginal and non- Aboriginal patients admitted to Western Australian hospitals. *Internal Medicine*  
433 *Journal*. 2014;44(4):353-61.
- 434 13. Jordan S, Wilson A, Dobson A. Management of heart conditions in older rural and urban  
435 Australian women. *Internal Medicine Journal*. 2011;41(10):722-9.
- 436 14. NHRHA. The determinants of health in rural and remote Australia: fact sheet 28. Australian  
437 Capital Territory: National Rural Health Alliance; 2011.
- 438 15. WHF. World Heart Federation: 25 by 2025 Targets. Melbourne: World Heart Federation,  
439 2014.
- 440 16. NRHA. Smoking and rural health. Australian Capital Territory: National Rural Health Alliance;  
441 2014.
- 442 17. Scarborough P, Harrington RA, Mizdrak A, Zhou LM, Doherty A. The Preventable Risk  
443 Integrated Model and Its Use to Estimate the Health Impact of Public Health Policy Scenarios.  
444 *Scientifica*. 2014;2014:748750.
- 445 18. Scarborough P, Morgan RD, Webster P, Rayner M. Differences in coronary heart disease,  
446 stroke and cancer mortality rates between England, Wales, Scotland and Northern Ireland: the role  
447 of diet and nutrition. *BMJ open*. 2011 Jan 1;1(1):e000263.
- 448 19. Scarborough P, Allender S, Clarke D, Wickramasinghe K, Rayner M. Modelling the health  
449 impact of environmentally sustainable dietary scenarios in the UK. *European journal of clinical*  
450 *nutrition*. 2012 Jun;66(6):710-5.

- 1  
2  
3 451 20. Belanger M, Poirier M, Jbilou J, Scarborough P. Modelling the impact of compliance with  
4 452 dietary recommendations on cancer and cardiovascular disease mortality in Canada. *Public health*.  
5 453 2014 Mar;128(3):222-30.
- 6 454 21. ABS. Australian Statistical Geography Standard Canberra, Australia: ABS; 2014 [cited 2016  
7 455 04/07/2016]. Available from:  
8 456 [http://www.abs.gov.au/websitedbs/D3310114.nsf/home/Australian+Statistical+Geography+Standar](http://www.abs.gov.au/websitedbs/D3310114.nsf/home/Australian+Statistical+Geography+Standard+(ASGS))  
9 457 [d+\(ASGS\)](http://www.abs.gov.au/websitedbs/D3310114.nsf/home/Australian+Statistical+Geography+Standard+(ASGS)).
- 10 458 22. ABS. TableBuilder:How to apply for access to microdata Australia: Australian Bureau of  
11 459 Statistics; 2011 [updated 30 June 2017; cited 2017 17/07/2017]. Available from:  
12 460 <http://www.abs.gov.au/websitedbs/D3310114.nsf/home/About+TableBuilder>.
- 13 461 23. ABS. 4363.0.55.001 - Australian Health Survey: Users' Guide, 2011-13: Sample design and  
14 462 selection Canberra: Australian Bureau of Statistics; 2015 [cited 2016 20/06/2016]. Available from:  
15 463 <http://www.abs.gov.au/ausstats/abs@.nsf/Lookup/4363.0.55.001Chapter2102011-13>.
- 16 464 24. ABS. 4363.0.55.001 - Australian Health Survey: Users' Guide, 2011-13 : Adult Physical  
17 465 Activity: Australian Bureau of Statistics 2015 [cited 2016 27/06/2016]. Available from:  
18 466 [http://www.abs.gov.au/ausstats/abs@.nsf/Lookup/59FF6FE5D62BABE1CA257BAC00225A07?opend](http://www.abs.gov.au/ausstats/abs@.nsf/Lookup/59FF6FE5D62BABE1CA257BAC00225A07?opendocument)  
19 467 [ocument](http://www.abs.gov.au/ausstats/abs@.nsf/Lookup/59FF6FE5D62BABE1CA257BAC00225A07?opendocument).
- 20 468 25. 2014. AloHaW. Australia's health 2014: Australia's health series no. 14. Cat. no. AUS 178:  
21 469 Health in regional and remote areas. . Canberra, Australia: AIHW; 2014.
- 22 470 26. Patterson KA, Cleland V, Venn A, Blizzard L, Gall S. A cross-sectional study of geographic  
23 471 differences in health risk factors among young Australian adults: the role of socioeconomic position.  
24 472 *BMC public health*. 2014;14:1278.
- 25 473 27. AIHW. Rural, regional and remote health: Indicators of health status and determinants of  
26 474 health. Canberra, Australia: Australian Institute of Health and Welfare; 2008.
- 27 475 28. Wu JR, Moser DK, DeWalt DA, Rayens MK, Dracup K. Health Literacy Mediates the  
28 476 Relationship Between Age and Health Outcomes in Patients With Heart Failure. *Circulation Heart*  
29 477 *failure*. 2016 Jan;9(1):e002250.
- 30 478 29. NHRA. Obesity in rural Australia. Australian Capital Territory: National Rural Health Alliance;  
31 479 2013.
- 32 480 30. French SA, Story M, Jeffery RW. Environmental influences on eating and physical activity.  
33 481 *Annual review of public health*. 2001;22:309-35. PubMed PMID: 11274524.
- 34 482 31. health Q. 2014 Healthy food access basket survey, Queensland Queensland, Australia:  
35 483 Queensland Government; 2015 [cited 2016 22/06/2016]. Available from:  
36 484 <https://www.health.qld.gov.au/research-reports/reports/food/access/guidelines/default.asp>.
- 37 485 32. Ronksley PE, Brien SE, Turner BJ, Mukamal KJ, Ghali WA. Association of alcohol consumption  
38 486 with selected cardiovascular disease outcomes: a systematic review and meta-analysis. *Bmj*. 2011  
39 487 Feb 22;342:d671.
- 40 488 33. AIHW. Australia's health 2014: Leading types of ill health: AIHW; 2014 [cited 2016  
41 489 22/06/2016]. Available from: <http://www.aihw.gov.au/australias-health/2014/ill-health/#>.
- 42 490 34. Ball K, Mishra GD, Thane CW, A H. How well do Australian women comply with dietary  
43 491 guidelines? *Public Health Nutrition* 2004;4;7(3):443–52.
- 44 492 35. ABS. 4364.0.55.012 - Australian Health Survey: Consumption of Food Groups from the  
45 493 Australian Dietary Guidelines, 2011-12 Canberra, Australia; 2016 [cited 2016 04/07/2016]. Available from:  
46 494 [cited 2016 04/07/2016]. Available from:  
47 495 [http://www.abs.gov.au/websitedbs/D3310114.nsf/home/Australian+Statistical+Geography+Standar](http://www.abs.gov.au/websitedbs/D3310114.nsf/home/Australian+Statistical+Geography+Standard+(ASGS))  
48 496 [d+\(ASGS\)](http://www.abs.gov.au/websitedbs/D3310114.nsf/home/Australian+Statistical+Geography+Standard+(ASGS)).
- 49 497 36. ABS. 4363.0.55.001 - Australian Health Survey: Users' Guide, 2011-13: UNDER-REPORTING IN  
50 498 NUTRITION SURVEYS Canberra: Australian Bureau of statistics; 2015 [cited 2016 20/06/2016].  
51 499 Available from:  
52 500 <http://www.abs.gov.au/ausstats/abs@.nsf/Lookup/4363.0.55.001Chapter651512011-13>.

1  
2  
3 501  
4  
5 502  
6  
7  
8  
9  
10  
11  
12  
13  
14  
15  
16  
17  
18  
19  
20  
21  
22  
23  
24  
25  
26  
27  
28  
29  
30  
31  
32  
33  
34  
35  
36  
37  
38  
39  
40  
41  
42  
43  
44  
45  
46  
47  
48  
49  
50  
51  
52  
53  
54  
55  
56  
57  
58  
59  
60

For peer review only
